# Supplementary material
Source: publisher figshare collection journal article supplement (https://acs.figshare.com/ndownloader/files/5092933)
Supplement: Supplementary file 1 [file 5092933]

#========================================================================
# CIF for #Compound 1.3CH2Cl2.CH3OH.0.5H2O, 2.3.5CH2Cl2.2CH3OH
#========================================================================
data_global

_publ_contact_author_name       'F. A. Cotton'
_publ_contact_author_address
;  Laboratory for Molecular Structure and Bonding
   Dept. of Chemistry
   Texas A&M University, PO Box  30012
   College Station, TX 77842-3012, USA
;
_publ_contact_author_email     cotton@tamu.edu
_publ_contact_author_fax       '(979) 845 9351'
_publ_contact_author_phone     '(979) 845 4432'

_publ_requested_journal        'Inorganic Chemistry'

#AUTHOR LIST

loop_

       _publ_author_name
       _publ_author_address                                                   


'F. Albert Cotton'

; Laboratory for Molecular Structure and Bonding
  Dept. of Chemistry, PO Box 30012
  College Station, TX 77842-3012, USA
;

'Carlos A. Murillo'
; Laboratory for Molecular Structure and Bonding
  Dept. of Chemistry, PO Box 30012
  College Station, TX 77842-3012, USA
;

'Rongmin Yu'
; Laboratory for Molecular Structure and Bonding
  Dept. of Chemistry, PO Box 30012
  College Station, TX 77842-3012, USA
; 
#========================================================
#Compound 1.3CH2Cl2.CH3OH.0.5H2O
#========================================================   

data_compound_1
 
_audit_creation_method            SHELXL-97 
_chemical_name_systematic 
; 
 ? 
; 
_chemical_name_common             ? 
_chemical_melting_point           ? 
_chemical_formula_moiety          
 'Rh4 (C18 H14 P)4 (C5 H5 N)4 (C4 F4 O4 )2, 3CH2 Cl2, CH3 OH, 0.5H2 O' 
_chemical_formula_sum 
 'C104 H87 Cl6 F8 N4 O9.50 P4 Rh4' 
_chemical_formula_weight          2445.00 
 
loop_ 
 _atom_type_symbol 
 _atom_type_description 
 _atom_type_scat_dispersion_real 
 _atom_type_scat_dispersion_imag 
 _atom_type_scat_source 
 'C'  'C'   0.0033   0.0016 
 'International Tables Vol C Tables 4.2.6.8 and 6.1.1.4' 
 'H'  'H'   0.0000   0.0000 
 'International Tables Vol C Tables 4.2.6.8 and 6.1.1.4' 
 'N'  'N'   0.0061   0.0033 
 'International Tables Vol C Tables 4.2.6.8 and 6.1.1.4' 
 'O'  'O'   0.0106   0.0060 
 'International Tables Vol C Tables 4.2.6.8 and 6.1.1.4' 
 'F'  'F'   0.0171   0.0103 
 'International Tables Vol C Tables 4.2.6.8 and 6.1.1.4' 
 'P'  'P'   0.1023   0.0942 
 'International Tables Vol C Tables 4.2.6.8 and 6.1.1.4' 
 'Cl'  'Cl'   0.1484   0.1585 
 'International Tables Vol C Tables 4.2.6.8 and 6.1.1.4' 
 'Rh'  'Rh'  -1.1178   0.9187 
 'International Tables Vol C Tables 4.2.6.8 and 6.1.1.4' 
 
_symmetry_cell_setting            Monoclinic
_symmetry_space_group_name_H-M    P2(1) 
 
loop_ 
 _symmetry_equiv_pos_as_xyz 
 'x, y, z' 
 '-x, y+1/2, -z' 
 
_cell_length_a                    15.645(14) 
_cell_length_b                    17.639(16) 
_cell_length_c                    19.208(18) 
_cell_angle_alpha                 90.00 
_cell_angle_beta                  99.304(16) 
_cell_angle_gamma                 90.00 
_cell_volume                      5231(8) 
_cell_formula_units_Z             2 
_cell_measurement_temperature     213(2) 
_cell_measurement_reflns_used     5510 
_cell_measurement_theta_min       2.44 
_cell_measurement_theta_max       27.58 
 
_exptl_crystal_description        prism 
_exptl_crystal_colour             orange 
_exptl_crystal_size_max           0.32 
_exptl_crystal_size_mid           0.18
_exptl_crystal_size_min           0.14 
_exptl_crystal_density_meas       ? 
_exptl_crystal_density_diffrn     1.552 
_exptl_crystal_density_method     'not measured' 
_exptl_crystal_F_000              2458 
_exptl_absorpt_coefficient_mu     0.907 
_exptl_absorpt_correction_type    multi-scan 
_exptl_absorpt_correction_T_min   0.7601 
_exptl_absorpt_correction_T_max   0.8835 
_exptl_absorpt_process_details    sadabs 
 
_exptl_special_details 
; 
 ? 
; 
 
_diffrn_ambient_temperature       213(2) 
_diffrn_radiation_wavelength      0.71073 
_diffrn_radiation_type            MoK\a 
_diffrn_radiation_source          'normal-focus sealed tube' 
_diffrn_radiation_monochromator   graphite 
_diffrn_measurement_device_type   'Bruker SMART 1000' 
_diffrn_measurement_method        '\w scans' 
_diffrn_detector_area_resol_mean  0 
_diffrn_standards_number          0 
_diffrn_standards_interval_count  0 
_diffrn_standards_interval_time   0 
_diffrn_standards_decay_%         0 
_diffrn_reflns_number             29106 
_diffrn_reflns_av_R_equivalents   0.0596 
_diffrn_reflns_av_sigmaI/netI     0.0889 
_diffrn_reflns_limit_h_min        -20 
_diffrn_reflns_limit_h_max        17 
_diffrn_reflns_limit_k_min        -22 
_diffrn_reflns_limit_k_max        15 
_diffrn_reflns_limit_l_min        -23 
_diffrn_reflns_limit_l_max        25 
_diffrn_reflns_theta_min          1.56 
_diffrn_reflns_theta_max          28.00 
_reflns_number_total              19947 
_reflns_number_gt                 14200 
_reflns_threshold_expression      >2sigma(I) 
 
_computing_data_collection        SMART 
_computing_cell_refinement        SAINT 
_computing_data_reduction         SAINT 
_computing_structure_solution     'SHELXS-97 (Sheldrick, 1990)' 
_computing_structure_refinement   'SHELXL-97 (Sheldrick, 1997)' 
_computing_molecular_graphics     'SHELXTL (Siemens, 1996)' 
_computing_publication_material   CIFTAB
 
_refine_special_details 
; 
 Refinement of F^2^ against ALL reflections.  The weighted R-factor wR and 
 goodness of fit S are based on F^2^, conventional R-factors R are based 
 on F, with F set to zero for negative F^2^. The threshold expression of 
 F^2^ > 2sigma(F^2^) is used only for calculating R-factors(gt) etc. and is 
 not relevant to the choice of reflections for refinement.  R-factors based 
 on F^2^ are statistically about twice as large as those based on F, and R- 
 factors based on ALL data will be even larger. 
; 
 
_refine_ls_structure_factor_coef  Fsqd  
_refine_ls_matrix_type            full 
_refine_ls_weighting_scheme       calc  
_refine_ls_weighting_details 
 'calc w=1/[\s^2^(Fo^2^)+(0.1159P)^2^+0.0000P] where P=(Fo^2^+2Fc^2^)/3' 
_atom_sites_solution_primary      direct 
_atom_sites_solution_secondary    difmap 
_atom_sites_solution_hydrogens    geom 
_refine_ls_hydrogen_treatment     noref 
_refine_ls_extinction_method      none 
_refine_ls_extinction_coef        ? 
_refine_ls_abs_structure_details 
 'Flack H D (1983), Acta Cryst. A39, 876-881' 
_refine_ls_abs_structure_Flack    -0.04(3) 
_refine_ls_number_reflns          19947 
_refine_ls_number_parameters      1222 
_refine_ls_number_restraints      6 
_refine_ls_R_factor_all           0.0933 
_refine_ls_R_factor_gt            0.0603 
_refine_ls_wR_factor_ref          0.1899 
_refine_ls_wR_factor_gt           0.1615 
_refine_ls_goodness_of_fit_ref    1.007 
_refine_ls_restrained_S_all       1.007 
_refine_ls_shift/su_max           0.001 
_refine_ls_shift/su_mean          0.000 

loop_ 
 _atom_site_label 
 _atom_site_type_symbol 
 _atom_site_fract_x 
 _atom_site_fract_y 
 _atom_site_fract_z 
 _atom_site_U_iso_or_equiv 
 _atom_site_adp_type 
 _atom_site_occupancy 
 _atom_site_symmetry_multiplicity 
 _atom_site_calc_flag 
 _atom_site_refinement_flags 
 _atom_site_disorder_assembly 
 _atom_site_disorder_group 
Rh1 Rh 0.16742(4) -0.05095(12) 0.68751(3) 0.02601(17) Uani 1 1 d . . . 
Rh2 Rh 0.28676(4) -0.05383(12) 0.61237(3) 0.02701(17) Uani 1 1 d . . . 
Rh3 Rh 0.27411(4) 0.29547(12) 0.84998(3) 0.02537(18) Uani 1 1 d . . . 
Rh4 Rh 0.38469(4) 0.28128(12) 0.76768(3) 0.02463(17) Uani 1 1 d . . . 
P1 P 0.18642(15) -0.17419(19) 0.70859(11) 0.0300(5) Uani 1 1 d . . . 
P2 P 0.19549(15) -0.10891(19) 0.52873(11) 0.0300(5) Uani 1 1 d . . . 
P3 P 0.26544(14) 0.41799(18) 0.82379(11) 0.0265(5) Uani 1 1 d . . . 
P4 P 0.48181(14) 0.33665(19) 0.84690(11) 0.0269(5) Uani 1 1 d . . . 
F1 F 0.4237(4) -0.0600(4) 0.8567(3) 0.0466(14) Uani 1 1 d . . . 
F2 F 0.4858(3) 0.0342(4) 0.8112(3) 0.0358(13) Uani 1 1 d . . . 
F3 F 0.3158(4) 0.0290(4) 0.9077(3) 0.0397(14) Uani 1 1 d . . . 
F4 F 0.4452(4) 0.0730(4) 0.9322(3) 0.0449(15) Uani 1 1 d . . . 
F5 F 0.0866(4) 0.1606(4) 0.5403(3) 0.0522(17) Uani 1 1 d . . . 
F6 F 0.2175(4) 0.2035(4) 0.5522(3) 0.0495(15) Uani 1 1 d . . . 
F7 F 0.1216(4) 0.2960(4) 0.6098(3) 0.0531(17) Uani 1 1 d . . . 
F8 F 0.0634(3) 0.2066(4) 0.6619(3) 0.0471(16) Uani 1 1 d . . . 
O1 O 0.1595(4) 0.0698(4) 0.6659(3) 0.0335(16) Uani 1 1 d . . . 
O2 O 0.2395(4) 0.0596(4) 0.5800(3) 0.0332(15) Uani 1 1 d . . . 
O3 O 0.1810(4) 0.2690(4) 0.7563(3) 0.0302(15) Uani 1 1 d . . . 
O4 O 0.2827(4) 0.2251(4) 0.6964(3) 0.0289(14) Uani 1 1 d . . . 
O5 O 0.2705(4) -0.0192(4) 0.7705(3) 0.0330(16) Uani 1 1 d . . . 
O6 O 0.3698(4) -0.0002(4) 0.7001(3) 0.0351(16) Uani 1 1 d . . . 
O7 O 0.2845(4) 0.1715(4) 0.8672(3) 0.0282(14) Uani 1 1 d . . . 
O8 O 0.4034(4) 0.1716(4) 0.8163(3) 0.0337(15) Uani 1 1 d . . . 
N1 N 0.0872(6) -0.0257(5) 0.7692(4) 0.038(2) Uani 1 1 d . . . 
N2 N 0.3877(5) -0.0254(5) 0.5430(4) 0.036(2) Uani 1 1 d . . . 
N3 N 0.1563(5) 0.2954(5) 0.9060(4) 0.039(2) Uani 1 1 d . . . 
N4 N 0.4793(5) 0.2353(5) 0.6997(4) 0.0307(17) Uani 1 1 d . . . 
C1 C 0.2958(6) -0.1980(6) 0.6985(4) 0.036(2) Uani 1 1 d . . . 
C2 C 0.3396(6) -0.1478(6) 0.6561(4) 0.032(2) Uani 1 1 d . . . 
C3 C 0.4259(6) -0.1638(7) 0.6564(5) 0.041(2) Uani 1 1 d . . . 
H3A H 0.4580 -0.1320 0.6310 0.049 Uiso 1 1 calc R . . 
C4 C 0.4668(7) -0.2247(9) 0.6925(6) 0.065(4) Uani 1 1 d . . . 
H4A H 0.5260 -0.2326 0.6912 0.078 Uiso 1 1 calc R . . 
C5 C 0.4242(7) -0.2742(8) 0.7302(6) 0.056(3) Uani 1 1 d . . . 
H5A H 0.4530 -0.3166 0.7526 0.068 Uiso 1 1 calc R . . 
C6 C 0.3368(7) -0.2603(7) 0.7347(5) 0.047(3) Uani 1 1 d . . . 
H6A H 0.3066 -0.2921 0.7615 0.056 Uiso 1 1 calc R . . 
C7 C 0.1157(6) -0.2470(6) 0.6631(4) 0.034(2) Uani 1 1 d . . . 
C8 C 0.1456(6) -0.3193(6) 0.6526(5) 0.037(2) Uani 1 1 d . . . 
H8A H 0.2054 -0.3290 0.6612 0.045 Uiso 1 1 calc R . . 
C9 C 0.0896(8) -0.3765(6) 0.6299(6) 0.048(3) Uani 1 1 d . . . 
H9A H 0.1109 -0.4257 0.6249 0.057 Uiso 1 1 calc R . . 
C10 C 0.0009(7) -0.3625(7) 0.6141(5) 0.045(3) Uani 1 1 d . . . 
H10A H -0.0378 -0.4020 0.5985 0.054 Uiso 1 1 calc R . . 
C11 C -0.0286(7) -0.2919(7) 0.6214(6) 0.048(3) Uani 1 1 d . . . 
H11A H -0.0882 -0.2819 0.6093 0.057 Uiso 1 1 calc R . . 
C12 C 0.0279(6) -0.2329(7) 0.6469(5) 0.044(3) Uani 1 1 d . . . 
H12A H 0.0062 -0.1840 0.6528 0.053 Uiso 1 1 calc R . . 
C13 C 0.1825(6) -0.1993(7) 0.8008(5) 0.043(3) Uani 1 1 d . . . 
C14 C 0.1324(9) -0.2600(7) 0.8179(6) 0.057(3) Uani 1 1 d . . . 
H14A H 0.0962 -0.2870 0.7825 0.068 Uiso 1 1 calc R . . 
C15 C 0.1373(10) -0.2796(9) 0.8891(6) 0.075(4) Uani 1 1 d . . . 
H15A H 0.1076 -0.3227 0.9013 0.090 Uiso 1 1 calc R . . 
C16 C 0.1833(9) -0.2383(8) 0.9399(5) 0.065(4) Uani 1 1 d . . . 
H16A H 0.1831 -0.2500 0.9876 0.078 Uiso 1 1 calc R . . 
C17 C 0.2298(8) -0.1799(8) 0.9221(5) 0.058(3) Uani 1 1 d . . . 
H17A H 0.2628 -0.1515 0.9583 0.070 Uiso 1 1 calc R . . 
C18 C 0.2315(7) -0.1599(7) 0.8543(5) 0.053(3) Uani 1 1 d . . . 
H18A H 0.2662 -0.1192 0.8440 0.063 Uiso 1 1 calc R . . 
C19 C 0.0872(5) -0.0842(6) 0.5384(4) 0.029(2) Uani 1 1 d . . . 
C20 C 0.0729(5) -0.0625(6) 0.6064(4) 0.027(2) Uani 1 1 d . . . 
C21 C -0.0116(6) -0.0404(6) 0.6126(5) 0.035(2) Uani 1 1 d . . . 
H21A H -0.0235 -0.0238 0.6565 0.042 Uiso 1 1 calc R . . 
C22 C -0.0777(6) -0.0425(6) 0.5554(5) 0.039(2) Uani 1 1 d . . . 
H22A H -0.1340 -0.0288 0.5617 0.047 Uiso 1 1 calc R . . 
C23 C -0.0634(6) -0.0639(6) 0.4904(5) 0.039(2) Uani 1 1 d . . . 
H23A H -0.1095 -0.0660 0.4525 0.046 Uiso 1 1 calc R . . 
C24 C 0.0199(6) -0.0827(6) 0.4803(5) 0.039(2) Uani 1 1 d . . . 
H24A H 0.0311 -0.0944 0.4349 0.047 Uiso 1 1 calc R . . 
C25 C 0.1972(5) -0.2109(6) 0.5135(4) 0.034(2) Uani 1 1 d . . . 
C26 C 0.2789(6) -0.2480(6) 0.5217(4) 0.039(2) Uani 1 1 d . . . 
H26A H 0.3298 -0.2215 0.5397 0.046 Uiso 1 1 calc R . . 
C27 C 0.2826(7) -0.3241(6) 0.5027(5) 0.040(2) Uani 1 1 d . . . 
H27A H 0.3365 -0.3487 0.5070 0.048 Uiso 1 1 calc R . . 
C28 C 0.2065(8) -0.3643(7) 0.4773(5) 0.051(3) Uani 1 1 d . . . 
H28A H 0.2094 -0.4154 0.4640 0.061 Uiso 1 1 calc R . . 
C29 C 0.1283(7) -0.3284(6) 0.4720(5) 0.045(3) Uani 1 1 d . . . 
H29A H 0.0773 -0.3558 0.4560 0.054 Uiso 1 1 calc R . . 
C30 C 0.1226(6) -0.2535(6) 0.4893(4) 0.037(2) Uani 1 1 d . . . 
H30A H 0.0679 -0.2303 0.4850 0.044 Uiso 1 1 calc R . . 
C31 C 0.2059(6) -0.0747(6) 0.4414(4) 0.036(2) Uani 1 1 d . . . 
C32 C 0.2081(8) 0.0052(8) 0.4295(5) 0.059(3) Uani 1 1 d . . . 
H32A H 0.2007 0.0393 0.4657 0.070 Uiso 1 1 calc R . . 
C33 C 0.2210(9) 0.0314(8) 0.3650(6) 0.062(3) Uani 1 1 d . . . 
H33A H 0.2198 0.0839 0.3563 0.074 Uiso 1 1 calc R . . 
C34 C 0.2361(7) -0.0191(10) 0.3112(6) 0.065(4) Uani 1 1 d . . . 
H34A H 0.2482 -0.0003 0.2680 0.078 Uiso 1 1 calc R . . 
C35 C 0.2329(8) -0.0950(8) 0.3222(6) 0.059(3) Uani 1 1 d . . . 
H35A H 0.2402 -0.1290 0.2860 0.071 Uiso 1 1 calc R . . 
C36 C 0.2186(8) -0.1219(7) 0.3874(5) 0.053(3) Uani 1 1 d . . . 
H36A H 0.2177 -0.1746 0.3947 0.063 Uiso 1 1 calc R . . 
C37 C 0.2955(5) 0.4342(6) 0.7379(4) 0.030(2) Uani 1 1 d . . . 
C38 C 0.3472(5) 0.3744(5) 0.7138(4) 0.0272(19) Uani 1 1 d . . . 
C39 C 0.3601(6) 0.3819(6) 0.6441(5) 0.038(2) Uani 1 1 d . . . 
H39A H 0.3905 0.3436 0.6244 0.045 Uiso 1 1 calc R . . 
C40 C 0.3310(6) 0.4418(8) 0.6038(5) 0.053(3) Uani 1 1 d . . . 
H40A H 0.3430 0.4451 0.5575 0.063 Uiso 1 1 calc R . . 
C41 C 0.2821(7) 0.5007(7) 0.6304(5) 0.049(3) Uani 1 1 d . . . 
H41A H 0.2630 0.5432 0.6026 0.058 Uiso 1 1 calc R . . 
C42 C 0.2647(7) 0.4934(6) 0.6948(5) 0.037(2) Uani 1 1 d . . . 
H42A H 0.2299 0.5302 0.7119 0.045 Uiso 1 1 calc R . . 
C43 C 0.3178(5) 0.4931(6) 0.8816(4) 0.028(2) Uani 1 1 d . . . 
C44 C 0.3324(6) 0.4827(6) 0.9541(4) 0.036(2) Uani 1 1 d . . . 
H44A H 0.3214 0.4354 0.9734 0.044 Uiso 1 1 calc R . . 
C45 C 0.3635(6) 0.5431(7) 0.9989(5) 0.042(3) Uani 1 1 d . . . 
H45A H 0.3757 0.5354 1.0479 0.051 Uiso 1 1 calc R . . 
C46 C 0.3760(7) 0.6125(6) 0.9715(5) 0.043(3) Uani 1 1 d . . . 
H46A H 0.3939 0.6532 1.0020 0.052 Uiso 1 1 calc R . . 
C47 C 0.3629(7) 0.6235(8) 0.9015(6) 0.050(3) Uani 1 1 d . . . 
H47A H 0.3729 0.6713 0.8826 0.061 Uiso 1 1 calc R . . 
C48 C 0.3340(6) 0.5621(6) 0.8565(5) 0.038(2) Uani 1 1 d . . . 
H48A H 0.3257 0.5697 0.8074 0.046 Uiso 1 1 calc R . . 
C49 C 0.1523(5) 0.4506(7) 0.8116(4) 0.036(2) Uani 1 1 d . . . 
C50 C 0.1240(7) 0.4957(8) 0.8589(6) 0.064(4) Uani 1 1 d . . . 
H50A H 0.1628 0.5115 0.8989 0.077 Uiso 1 1 calc R . . 
C51 C 0.0357(8) 0.5202(9) 0.8498(7) 0.071(4) Uani 1 1 d . . . 
H51A H 0.0158 0.5519 0.8831 0.086 Uiso 1 1 calc R . . 
C52 C -0.0189(7) 0.4959(9) 0.7908(7) 0.076(5) Uani 1 1 d . . . 
H52A H -0.0774 0.5108 0.7833 0.091 Uiso 1 1 calc R . . 
C53 C 0.0107(6) 0.4512(9) 0.7440(6) 0.062(3) Uani 1 1 d . . . 
H53A H -0.0270 0.4362 0.7031 0.075 Uiso 1 1 calc R . . 
C54 C 0.0951(7) 0.4267(7) 0.7543(5) 0.049(3) Uani 1 1 d . . . 
H54A H 0.1138 0.3933 0.7217 0.059 Uiso 1 1 calc R . . 
C55 C 0.4547(6) 0.3181(6) 0.9326(4) 0.031(2) Uani 1 1 d . . . 
C56 C 0.3660(6) 0.3026(6) 0.9359(4) 0.035(2) Uani 1 1 d . . . 
C57 C 0.3466(6) 0.2769(6) 0.9988(4) 0.036(2) Uani 1 1 d . . . 
H57A H 0.2902 0.2605 1.0018 0.043 Uiso 1 1 calc R . . 
C58 C 0.4107(7) 0.2749(7) 1.0581(4) 0.046(3) Uani 1 1 d . . . 
H58A H 0.3957 0.2594 1.1014 0.055 Uiso 1 1 calc R . . 
C59 C 0.4926(7) 0.2942(6) 1.0560(5) 0.043(3) Uani 1 1 d . . . 
H59A H 0.5342 0.2944 1.0972 0.052 Uiso 1 1 calc R . . 
C60 C 0.5147(6) 0.3138(6) 0.9921(5) 0.033(2) Uani 1 1 d . . . 
H60A H 0.5730 0.3245 0.9895 0.040 Uiso 1 1 calc R . . 
C61 C 0.5103(5) 0.4362(6) 0.8420(4) 0.029(2) Uani 1 1 d . . . 
C62 C 0.5310(6) 0.4807(6) 0.9029(5) 0.035(2) Uani 1 1 d . . . 
H62A H 0.5236 0.4614 0.9472 0.042 Uiso 1 1 calc R . . 
C63 C 0.5629(6) 0.5542(6) 0.8972(5) 0.044(3) Uani 1 1 d . . . 
H63A H 0.5776 0.5837 0.9381 0.053 Uiso 1 1 calc R . . 
C64 C 0.5731(6) 0.5835(6) 0.8338(5) 0.038(2) Uani 1 1 d . . . 
H64A H 0.5951 0.6329 0.8313 0.045 Uiso 1 1 calc R . . 
C65 C 0.5516(6) 0.5422(6) 0.7739(5) 0.042(2) Uani 1 1 d . . . 
H65A H 0.5597 0.5626 0.7302 0.050 Uiso 1 1 calc R . . 
C66 C 0.5173(6) 0.4687(6) 0.7772(5) 0.034(2) Uani 1 1 d . . . 
H66A H 0.4989 0.4415 0.7354 0.041 Uiso 1 1 calc R . . 
C67 C 0.5911(5) 0.2958(6) 0.8526(4) 0.034(2) Uani 1 1 d . . . 
C68 C 0.6639(6) 0.3391(6) 0.8539(5) 0.038(2) Uani 1 1 d . . . 
H68A H 0.6601 0.3923 0.8529 0.045 Uiso 1 1 calc R . . 
C69 C 0.7428(6) 0.3038(8) 0.8566(5) 0.047(3) Uani 1 1 d . . . 
H69A H 0.7929 0.3335 0.8581 0.056 Uiso 1 1 calc R . . 
C70 C 0.7504(6) 0.2245(8) 0.8573(5) 0.052(3) Uani 1 1 d . . . 
H70A H 0.8044 0.2008 0.8584 0.062 Uiso 1 1 calc R . . 
C71 C 0.6754(7) 0.1826(7) 0.8563(5) 0.050(3) Uani 1 1 d . . . 
H71A H 0.6790 0.1294 0.8566 0.060 Uiso 1 1 calc R . . 
C72 C 0.5982(6) 0.2150(7) 0.8548(5) 0.044(3) Uani 1 1 d . . . 
H72A H 0.5487 0.1849 0.8552 0.053 Uiso 1 1 calc R . . 
C73 C 0.1897(5) 0.0925(6) 0.6159(4) 0.0266(19) Uani 1 1 d . . . 
C74 C 0.1602(6) 0.1711(6) 0.5883(4) 0.032(2) Uani 1 1 d . . . 
C75 C 0.1371(6) 0.2284(6) 0.6420(4) 0.030(2) Uani 1 1 d . . . 
C76 C 0.2074(5) 0.2414(5) 0.7052(4) 0.0271(19) Uani 1 1 d . . . 
C77 C 0.3438(6) -0.0039(6) 0.7569(5) 0.032(2) Uani 1 1 d . . . 
C78 C 0.4089(6) 0.0092(6) 0.8254(4) 0.031(2) Uani 1 1 d . . . 
C79 C 0.3778(5) 0.0641(6) 0.8787(4) 0.028(2) Uani 1 1 d . . . 
C80 C 0.3494(5) 0.1432(6) 0.8510(4) 0.027(2) Uani 1 1 d . . . 
C81 C 0.0294(7) -0.0733(7) 0.7893(5) 0.050(3) Uani 1 1 d . . . 
H81A H 0.0135 -0.1158 0.7605 0.060 Uiso 1 1 calc R . . 
C82 C -0.0083(10) -0.0656(11) 0.8476(7) 0.087(5) Uani 1 1 d . . . 
H82A H -0.0506 -0.0993 0.8588 0.104 Uiso 1 1 calc R . . 
C83 C 0.0213(12) -0.0024(13) 0.8904(7) 0.113(7) Uani 1 1 d . . . 
H83A H 0.0004 0.0044 0.9332 0.136 Uiso 1 1 calc R . . 
C84 C 0.0798(9) 0.0496(9) 0.8717(6) 0.072(4) Uani 1 1 d . . . 
H84A H 0.0975 0.0925 0.8994 0.086 Uiso 1 1 calc R . . 
C85 C 0.1106(7) 0.0345(7) 0.8098(5) 0.047(3) Uani 1 1 d . . . 
H85A H 0.1504 0.0686 0.7954 0.056 Uiso 1 1 calc R . . 
C86 C 0.4065(7) 0.0487(8) 0.5377(6) 0.055(3) Uani 1 1 d . . . 
H86A H 0.3853 0.0823 0.5689 0.066 Uiso 1 1 calc R . . 
C87 C 0.4547(9) 0.0794(10) 0.4899(7) 0.075(4) Uani 1 1 d . . . 
H87A H 0.4684 0.1313 0.4900 0.090 Uiso 1 1 calc R . . 
C88 C 0.4807(8) 0.0312(10) 0.4435(6) 0.071(4) Uani 1 1 d . . . 
H88A H 0.5125 0.0490 0.4093 0.086 Uiso 1 1 calc R . . 
C89 C 0.4593(9) -0.0486(10) 0.4465(6) 0.076(4) Uani 1 1 d . . . 
H89A H 0.4772 -0.0842 0.4155 0.091 Uiso 1 1 calc R . . 
C90 C 0.4116(6) -0.0688(8) 0.4972(5) 0.052(3) Uani 1 1 d . . . 
H90A H 0.3949 -0.1199 0.4982 0.062 Uiso 1 1 calc R . . 
C91 C 0.0885(7) 0.2565(9) 0.8778(6) 0.073(5) Uani 1 1 d . . . 
H91A H 0.0941 0.2227 0.8409 0.087 Uiso 1 1 calc R . . 
C92 C 0.0114(9) 0.2623(15) 0.8989(8) 0.127(9) Uani 1 1 d . . . 
H92A H -0.0362 0.2347 0.8758 0.153 Uiso 1 1 calc R . . 
C93 C 0.0021(11) 0.3089(12) 0.9545(9) 0.100(6) Uani 1 1 d . . . 
H93A H -0.0506 0.3129 0.9717 0.120 Uiso 1 1 calc R . . 
C94 C 0.0731(11) 0.3485(10) 0.9830(9) 0.090(5) Uani 1 1 d . . . 
H94A H 0.0699 0.3825 1.0202 0.108 Uiso 1 1 calc R . . 
C95 C 0.1483(9) 0.3396(8) 0.9583(7) 0.068(4) Uani 1 1 d . . . 
H95A H 0.1972 0.3668 0.9799 0.082 Uiso 1 1 calc R . . 
C96 C 0.5484(6) 0.2732(7) 0.6858(4) 0.042(2) Uani 1 1 d . . . 
H96A H 0.5515 0.3259 0.6932 0.051 Uiso 1 1 calc R . . 
C97 C 0.6156(6) 0.2367(8) 0.6605(5) 0.050(3) Uani 1 1 d . . . 
H97A H 0.6634 0.2638 0.6494 0.060 Uiso 1 1 calc R . . 
C98 C 0.6100(7) 0.1604(8) 0.6525(7) 0.058(3) Uani 1 1 d . . . 
H98A H 0.6555 0.1341 0.6368 0.070 Uiso 1 1 calc R . . 
C99 C 0.5415(7) 0.1217(7) 0.6664(5) 0.046(3) Uani 1 1 d . . . 
H99A H 0.5390 0.0687 0.6616 0.055 Uiso 1 1 calc R . . 
C100 C 0.4729(6) 0.1621(6) 0.6884(5) 0.037(2) Uani 1 1 d . . . 
H10B H 0.4223 0.1363 0.6951 0.044 Uiso 1 1 calc R . . 
C1S C 0.0834(12) 0.6250(11) 0.2844(9) 0.098(5) Uiso 1 1 d . . . 
C2S C 0.7906(11) 0.5991(11) 0.9618(9) 0.094(5) Uiso 1 1 d . . . 
Cl1 Cl 0.1204(4) 0.7219(4) 0.2796(3) 0.1348(19) Uiso 1 1 d . . . 
Cl2 Cl 0.1648(6) 0.5648(5) 0.2728(4) 0.184(3) Uiso 1 1 d . . . 
Cl3 Cl 0.8729(4) 0.6473(4) 0.9595(3) 0.1191(16) Uiso 1 1 d . . . 
Cl4 Cl 0.8179(6) 0.4941(6) 0.9330(5) 0.204(4) Uiso 1 1 d . . . 
C3S C 0.808(3) 0.740(5) 0.788(5) 0.30(5) Uiso 0.50 1 d PD . . 
Cl5 Cl 0.7392(8) 0.6789(9) 0.7710(7) 0.153(5) Uiso 0.50 1 d PD . . 
Cl6 Cl 0.9044(11) 0.7510(12) 0.8002(12) 0.234(9) Uiso 0.50 1 d PD . . 
C8SA C 0.631(3) 0.898(3) 0.776(2) 0.074(13) Uiso 0.310(16) 1 d P A 1 
O8SA O 0.6624(18) 0.9242(18) 0.7188(14) 0.069(9) Uiso 0.310(16) 1 d P A 1 
C8SB C 0.676(2) 0.9306(18) 0.8321(16) 0.115(9) Uiso 0.690(16) 1 d P A 2 
O8SB O 0.7438(10) 0.9391(10) 0.8672(8) 0.090(5) Uiso 0.690(16) 1 d P A 2 
Cl7 Cl 0.5731(8) 0.7849(9) 0.5196(7) 0.156(5) Uiso 0.50 1 d PD . . 
Cl8 Cl 0.7503(11) 0.8265(16) 0.5694(16) 0.323(14) Uiso 0.50 1 d PD . . 
C4S C 0.6713(12) 0.7544(13) 0.5723(16) 0.102(11) Uiso 0.50 1 d PD . . 
O9S O 0.6794(11) 0.9190(11) 0.5923(9) 0.069(5) Uiso 0.50 1 d P . . 
 
loop_ 
 _atom_site_aniso_label 
 _atom_site_aniso_U_11 
 _atom_site_aniso_U_22 
 _atom_site_aniso_U_33 
 _atom_site_aniso_U_23 
 _atom_site_aniso_U_13 
 _atom_site_aniso_U_12 
Rh1 0.0244(3) 0.0292(5) 0.0241(3) -0.0016(3) 0.0029(2) -0.0009(3) 
Rh2 0.0254(3) 0.0302(5) 0.0251(3) -0.0036(3) 0.0030(2) 0.0002(3) 
Rh3 0.0254(3) 0.0268(5) 0.0243(3) -0.0014(3) 0.0053(2) -0.0005(3) 
Rh4 0.0229(3) 0.0276(4) 0.0232(3) -0.0001(3) 0.0034(2) -0.0002(3) 
P1 0.0321(12) 0.0276(15) 0.0286(10) 0.0033(10) -0.0002(9) -0.0006(10) 
P2 0.0300(11) 0.0341(16) 0.0249(10) -0.0041(9) 0.0014(8) 0.0044(10) 
P3 0.0254(10) 0.0281(15) 0.0251(9) -0.0044(9) 0.0010(8) -0.0021(10) 
P4 0.0252(10) 0.0296(15) 0.0249(9) -0.0003(9) 0.0008(8) -0.0007(10) 
F1 0.050(3) 0.034(4) 0.050(3) 0.003(3) -0.009(2) -0.003(3) 
F2 0.024(2) 0.044(4) 0.038(3) -0.004(2) -0.001(2) 0.003(2) 
F3 0.048(3) 0.037(4) 0.036(3) 0.004(2) 0.012(2) -0.009(3) 
F4 0.043(3) 0.053(4) 0.033(3) 0.003(3) -0.011(2) -0.003(3) 
F5 0.052(4) 0.059(5) 0.035(3) -0.011(3) -0.024(2) 0.015(3) 
F6 0.070(4) 0.041(4) 0.041(3) 0.010(3) 0.019(3) 0.007(3) 
F7 0.080(4) 0.032(4) 0.042(3) 0.006(3) -0.007(3) 0.022(3) 
F8 0.023(3) 0.069(5) 0.048(3) -0.012(3) 0.003(2) 0.004(3) 
O1 0.038(3) 0.032(4) 0.031(3) -0.004(3) 0.006(3) -0.003(3) 
O2 0.044(4) 0.025(4) 0.031(3) 0.001(3) 0.007(3) -0.003(3) 
O3 0.025(3) 0.038(4) 0.027(3) -0.007(3) 0.004(2) -0.003(3) 
O4 0.024(3) 0.028(4) 0.035(3) -0.007(3) 0.006(2) -0.006(3) 
O5 0.033(3) 0.040(5) 0.026(3) -0.006(3) 0.003(2) 0.000(3) 
O6 0.038(3) 0.039(4) 0.028(3) -0.001(3) 0.004(2) -0.006(3) 
O7 0.025(3) 0.022(4) 0.038(3) 0.001(3) 0.009(2) -0.003(3) 
O8 0.033(3) 0.038(4) 0.034(3) 0.004(3) 0.016(3) 0.002(3) 
N1 0.051(5) 0.037(6) 0.026(3) -0.010(3) 0.008(3) 0.017(4) 
N2 0.033(4) 0.044(6) 0.029(3) -0.004(3) -0.003(3) -0.005(4) 
N3 0.042(4) 0.027(5) 0.051(4) 0.009(4) 0.015(4) 0.008(4) 
N4 0.031(4) 0.035(5) 0.027(3) -0.004(3) 0.007(3) -0.003(4) 
C1 0.032(4) 0.043(7) 0.029(4) -0.006(4) -0.007(3) 0.012(4) 
C2 0.037(5) 0.035(6) 0.022(4) -0.002(4) -0.007(3) 0.012(4) 
C3 0.033(5) 0.049(7) 0.041(5) 0.005(5) 0.006(4) -0.001(5) 
C4 0.040(6) 0.091(11) 0.063(7) 0.008(7) 0.005(5) 0.025(7) 
C5 0.049(6) 0.060(9) 0.057(6) 0.018(6) -0.001(5) 0.034(6) 
C6 0.043(6) 0.048(8) 0.048(5) 0.006(5) 0.001(4) 0.008(5) 
C7 0.035(5) 0.042(7) 0.025(4) 0.002(4) 0.005(3) 0.003(4) 
C8 0.038(5) 0.036(7) 0.035(4) -0.002(4) -0.003(4) 0.003(5) 
C9 0.062(7) 0.022(6) 0.054(6) 0.001(5) -0.008(5) -0.003(5) 
C10 0.057(7) 0.032(7) 0.044(5) -0.003(5) 0.002(5) -0.009(5) 
C11 0.038(5) 0.038(7) 0.064(6) -0.008(5) 0.000(5) -0.001(5) 
C12 0.034(5) 0.043(7) 0.051(5) 0.000(5) 0.000(4) -0.003(5) 
C13 0.036(5) 0.060(8) 0.035(4) 0.006(5) 0.007(4) 0.007(5) 
C14 0.087(9) 0.037(7) 0.044(6) 0.002(5) 0.006(6) -0.018(6) 
C15 0.098(11) 0.079(11) 0.052(7) 0.006(7) 0.029(7) -0.013(9) 
C16 0.089(9) 0.083(11) 0.024(4) 0.012(5) 0.013(5) 0.001(8) 
C17 0.066(7) 0.074(10) 0.033(5) -0.001(5) 0.003(5) 0.006(7) 
C18 0.054(6) 0.061(9) 0.039(5) 0.004(5) -0.005(4) -0.015(6) 
C19 0.028(4) 0.022(5) 0.036(4) -0.008(4) 0.000(3) 0.002(4) 
C20 0.026(4) 0.021(6) 0.034(4) 0.008(4) 0.001(3) -0.002(4) 
C21 0.030(4) 0.029(6) 0.044(5) -0.002(4) 0.001(3) 0.005(4) 
C22 0.027(4) 0.038(7) 0.049(5) 0.003(5) -0.001(4) 0.010(4) 
C23 0.034(4) 0.030(6) 0.047(5) 0.007(4) -0.009(4) 0.015(4) 
C24 0.038(5) 0.044(7) 0.033(4) 0.005(4) -0.005(4) 0.004(5) 
C25 0.035(4) 0.037(6) 0.027(4) -0.006(4) 0.000(3) -0.007(4) 
C26 0.040(5) 0.041(7) 0.031(4) -0.003(4) -0.004(4) 0.005(5) 
C27 0.060(6) 0.023(6) 0.036(5) -0.001(4) 0.005(4) 0.007(5) 
C28 0.075(8) 0.030(7) 0.046(6) -0.001(5) 0.007(5) -0.006(6) 
C29 0.051(6) 0.032(7) 0.047(5) -0.003(5) -0.009(4) -0.005(5) 
C30 0.043(5) 0.033(6) 0.033(4) -0.010(4) 0.003(4) 0.006(4) 
C31 0.036(5) 0.045(7) 0.025(4) 0.002(4) -0.003(3) 0.003(4) 
C32 0.079(8) 0.062(9) 0.032(5) 0.002(5) 0.000(5) 0.007(7) 
C33 0.099(10) 0.045(8) 0.041(6) 0.006(5) 0.011(6) -0.003(7) 
C34 0.047(6) 0.104(13) 0.044(6) 0.011(7) 0.005(5) 0.000(7) 
C35 0.077(9) 0.056(9) 0.043(6) -0.008(6) 0.008(5) 0.023(7) 
C36 0.081(8) 0.033(7) 0.045(6) -0.001(5) 0.013(5) 0.016(6) 
C37 0.029(4) 0.030(6) 0.031(4) -0.002(4) 0.004(3) -0.002(4) 
C38 0.025(4) 0.031(6) 0.023(4) -0.001(3) -0.004(3) -0.005(4) 
C39 0.035(5) 0.046(7) 0.033(4) 0.007(4) 0.007(4) -0.003(5) 
C40 0.040(5) 0.089(10) 0.028(4) 0.007(6) 0.001(4) -0.003(6) 
C41 0.058(7) 0.045(7) 0.040(5) 0.013(5) -0.005(5) 0.011(6) 
C42 0.049(6) 0.029(6) 0.034(4) 0.000(4) 0.006(4) 0.005(5) 
C43 0.016(4) 0.026(6) 0.041(4) 0.003(4) -0.001(3) -0.007(4) 
C44 0.041(5) 0.036(6) 0.031(4) -0.004(4) 0.001(4) -0.003(4) 
C45 0.048(6) 0.048(8) 0.031(4) -0.006(4) 0.009(4) -0.007(5) 
C46 0.048(6) 0.028(7) 0.050(6) -0.014(5) -0.002(4) -0.002(5) 
C47 0.044(6) 0.050(8) 0.053(6) -0.002(5) -0.004(5) -0.007(5) 
C48 0.042(5) 0.027(6) 0.043(5) 0.007(4) -0.003(4) 0.002(4) 
C49 0.030(4) 0.036(6) 0.040(4) 0.000(5) 0.001(3) 0.008(5) 
C50 0.035(6) 0.098(11) 0.060(7) -0.030(7) 0.008(5) -0.002(6) 
C51 0.051(7) 0.080(11) 0.079(8) -0.038(8) 0.001(6) 0.019(7) 
C52 0.026(5) 0.116(13) 0.079(8) -0.032(8) -0.009(5) 0.005(6) 
C53 0.033(5) 0.085(10) 0.062(6) -0.021(7) -0.010(4) -0.001(6) 
C54 0.044(6) 0.047(8) 0.051(6) -0.009(5) -0.005(4) 0.000(5) 
C55 0.045(5) 0.023(6) 0.023(4) -0.001(3) 0.000(3) -0.001(4) 
C56 0.046(5) 0.037(7) 0.022(4) -0.004(4) 0.003(3) -0.007(5) 
C57 0.043(5) 0.031(6) 0.033(4) 0.011(4) 0.003(3) -0.003(5) 
C58 0.057(6) 0.055(8) 0.025(4) 0.005(5) 0.004(4) -0.008(6) 
C59 0.062(6) 0.023(6) 0.038(4) 0.011(4) -0.012(4) -0.002(5) 
C60 0.036(5) 0.024(6) 0.038(4) 0.002(4) 0.002(4) 0.001(4) 
C61 0.018(3) 0.033(6) 0.033(4) -0.007(4) -0.002(3) -0.004(4) 
C62 0.030(4) 0.044(7) 0.032(4) -0.005(4) 0.001(3) -0.004(4) 
C63 0.041(5) 0.035(7) 0.053(6) -0.010(5) -0.001(4) -0.004(5) 
C64 0.038(5) 0.027(6) 0.046(5) 0.002(4) -0.002(4) -0.010(4) 
C65 0.040(5) 0.037(7) 0.046(5) 0.009(4) 0.003(4) -0.001(5) 
C66 0.031(4) 0.030(6) 0.040(5) 0.005(4) 0.004(3) -0.004(4) 
C67 0.025(4) 0.042(7) 0.031(4) 0.007(4) -0.004(3) 0.006(4) 
C68 0.032(5) 0.038(7) 0.043(5) 0.008(4) 0.007(4) 0.001(4) 
C69 0.030(5) 0.062(9) 0.047(5) 0.003(5) 0.001(4) 0.004(5) 
C70 0.027(5) 0.080(11) 0.048(6) 0.001(6) 0.004(4) 0.018(5) 
C71 0.048(6) 0.051(8) 0.047(6) 0.004(5) -0.003(5) 0.027(6) 
C72 0.029(5) 0.061(8) 0.039(5) 0.007(5) -0.004(4) 0.000(5) 
C73 0.029(4) 0.022(5) 0.028(4) 0.000(3) 0.001(3) -0.001(4) 
C74 0.045(5) 0.024(6) 0.024(4) -0.002(4) -0.005(3) -0.004(4) 
C75 0.030(4) 0.028(6) 0.029(4) -0.002(4) -0.005(3) 0.004(4) 
C76 0.029(4) 0.023(5) 0.025(4) -0.001(3) -0.007(3) -0.004(4) 
C77 0.032(5) 0.029(6) 0.035(4) -0.005(4) 0.001(4) 0.005(4) 
C78 0.035(5) 0.018(6) 0.035(4) 0.003(4) -0.004(4) 0.005(4) 
C79 0.029(4) 0.033(6) 0.022(4) 0.003(4) 0.000(3) -0.003(4) 
C80 0.031(4) 0.031(6) 0.017(3) -0.007(3) -0.001(3) -0.004(4) 
C81 0.045(6) 0.062(9) 0.043(5) -0.002(5) 0.007(4) 0.001(6) 
C82 0.086(10) 0.114(15) 0.065(8) 0.005(9) 0.029(7) -0.022(10) 
C83 0.121(14) 0.18(2) 0.045(7) -0.031(10) 0.050(8) -0.043(14) 
C84 0.085(9) 0.093(12) 0.041(6) -0.017(6) 0.020(6) -0.008(8) 
C85 0.041(5) 0.054(8) 0.047(5) 0.006(5) 0.013(4) 0.006(5) 
C86 0.035(5) 0.056(9) 0.075(8) -0.012(6) 0.014(5) -0.007(6) 
C87 0.071(9) 0.079(12) 0.083(9) 0.015(8) 0.032(7) -0.009(8) 
C88 0.060(7) 0.109(14) 0.050(6) 0.009(7) 0.023(6) -0.002(8) 
C89 0.081(9) 0.096(12) 0.059(7) -0.035(8) 0.035(6) -0.034(9) 
C90 0.042(5) 0.065(9) 0.053(6) -0.021(6) 0.024(4) -0.010(6) 
C91 0.046(6) 0.130(15) 0.046(6) -0.014(7) 0.020(5) -0.029(7) 
C92 0.049(8) 0.26(3) 0.079(10) 0.019(14) 0.027(7) -0.049(12) 
C93 0.085(11) 0.120(17) 0.111(13) 0.032(11) 0.064(10) 0.030(11) 
C94 0.093(12) 0.078(12) 0.118(13) 0.014(10) 0.076(11) 0.006(10) 
C95 0.091(9) 0.048(8) 0.084(8) -0.033(7) 0.068(8) -0.013(7) 
C96 0.041(5) 0.054(7) 0.033(4) -0.002(5) 0.010(4) -0.003(5) 
C97 0.037(5) 0.068(9) 0.051(6) -0.006(6) 0.021(4) -0.017(5) 
C98 0.044(6) 0.058(9) 0.077(8) -0.013(6) 0.026(6) 0.006(6) 
C99 0.064(7) 0.029(6) 0.049(5) -0.002(5) 0.021(5) 0.014(5) 
C100 0.036(5) 0.036(7) 0.038(5) 0.005(4) 0.008(4) -0.005(4) 
 
_geom_special_details 
; 
 All esds (except the esd in the dihedral angle between two l.s. planes) 
 are estimated using the full covariance matrix.  The cell esds are taken 
 into account individually in the estimation of esds in distances, angles 
 and torsion angles; correlations between esds in cell parameters are only 
 used when they are defined by crystal symmetry.  An approximate (isotropic) 
 treatment of cell esds is used for estimating esds involving l.s. planes. 
; 
 
loop_ 
 _geom_bond_atom_site_label_1 
 _geom_bond_atom_site_label_2 
 _geom_bond_distance 
 _geom_bond_site_symmetry_2 
 _geom_bond_publ_flag 
Rh1 C20 1.978(8) . ? 
Rh1 O5 2.150(6) . ? 
Rh1 O1 2.170(7) . ? 
Rh1 N1 2.208(8) . ? 
Rh1 P1 2.222(3) . ? 
Rh1 Rh2 2.5383(19) . ? 
Rh2 C2 1.978(9) . ? 
Rh2 O6 2.171(6) . ? 
Rh2 O2 2.189(7) . ? 
Rh2 P2 2.196(3) . ? 
Rh2 N2 2.280(8) . ? 
Rh3 C56 2.010(9) . ? 
Rh3 O3 2.174(6) . ? 
Rh3 O7 2.214(7) . ? 
Rh3 P3 2.218(3) . ? 
Rh3 N3 2.280(8) . ? 
Rh3 Rh4 2.5374(19) . ? 
Rh4 C38 1.979(9) . ? 
Rh4 O8 2.148(7) . ? 
Rh4 O4 2.167(6) . ? 
Rh4 P4 2.198(3) . ? 
Rh4 N4 2.276(7) . ? 
P1 C1 1.802(9) . ? 
P1 C7 1.823(10) . ? 
P1 C13 1.837(9) . ? 
P2 C19 1.787(9) . ? 
P2 C31 1.815(9) . ? 
P2 C25 1.823(11) . ? 
P3 C37 1.811(9) . ? 
P3 C43 1.834(9) . ? 
P3 C49 1.840(9) . ? 
P4 C55 1.795(9) . ? 
P4 C61 1.817(10) . ? 
P4 C67 1.842(9) . ? 
F1 C78 1.364(11) . ? 
F2 C78 1.351(11) . ? 
F3 C79 1.345(10) . ? 
F4 C79 1.357(9) . ? 
F5 C74 1.366(10) . ? 
F6 C74 1.345(11) . ? 
F7 C75 1.347(11) . ? 
F8 C75 1.329(11) . ? 
O1 C73 1.206(10) . ? 
O2 C73 1.261(10) . ? 
O3 C76 1.226(10) . ? 
O4 C76 1.250(10) . ? 
O5 C77 1.247(11) . ? 
O6 C77 1.227(11) . ? 
O7 C80 1.217(10) . ? 
O8 C80 1.260(10) . ? 
N1 C85 1.333(14) . ? 
N1 C81 1.336(14) . ? 
N2 C90 1.268(13) . ? 
N2 C86 1.347(15) . ? 
N3 C95 1.294(13) . ? 
N3 C91 1.305(15) . ? 
N4 C100 1.312(13) . ? 
N4 C96 1.333(12) . ? 
C1 C6 1.400(14) . ? 
C1 C2 1.447(14) . ? 
C2 C3 1.379(13) . ? 
C3 C4 1.379(16) . ? 
C4 C5 1.375(18) . ? 
C5 C6 1.406(15) . ? 
C7 C12 1.380(13) . ? 
C7 C8 1.385(14) . ? 
C8 C9 1.360(14) . ? 
C9 C10 1.394(15) . ? 
C10 C11 1.344(16) . ? 
C11 C12 1.402(15) . ? 
C13 C18 1.367(14) . ? 
C13 C14 1.397(15) . ? 
C14 C15 1.401(16) . ? 
C15 C16 1.331(19) . ? 
C16 C17 1.337(18) . ? 
C17 C18 1.354(14) . ? 
C19 C24 1.405(11) . ? 
C19 C20 1.413(12) . ? 
C20 C21 1.402(12) . ? 
C21 C22 1.382(12) . ? 
C22 C23 1.357(13) . ? 
C23 C24 1.388(13) . ? 
C25 C30 1.402(13) . ? 
C25 C26 1.422(13) . ? 
C26 C27 1.395(14) . ? 
C27 C28 1.403(15) . ? 
C28 C29 1.366(16) . ? 
C29 C30 1.369(14) . ? 
C31 C36 1.369(14) . ? 
C31 C32 1.429(16) . ? 
C32 C33 1.369(15) . ? 
C33 C34 1.413(18) . ? 
C34 C35 1.357(18) . ? 
C35 C36 1.391(16) . ? 
C37 C42 1.371(13) . ? 
C37 C38 1.449(13) . ? 
C38 C39 1.393(12) . ? 
C39 C40 1.344(15) . ? 
C40 C41 1.432(16) . ? 
C41 C42 1.315(13) . ? 
C43 C48 1.349(13) . ? 
C43 C44 1.388(12) . ? 
C44 C45 1.405(14) . ? 
C45 C46 1.359(15) . ? 
C46 C47 1.342(14) . ? 
C47 C48 1.413(15) . ? 
C49 C50 1.335(14) . ? 
C49 C54 1.368(13) . ? 
C50 C51 1.431(15) . ? 
C51 C52 1.373(16) . ? 
C52 C53 1.334(17) . ? 
C53 C54 1.373(14) . ? 
C55 C60 1.359(12) . ? 
C55 C56 1.426(13) . ? 
C56 C57 1.369(12) . ? 
C57 C58 1.392(12) . ? 
C58 C59 1.333(14) . ? 
C59 C60 1.371(13) . ? 
C61 C66 1.390(12) . ? 
C61 C62 1.405(12) . ? 
C62 C63 1.399(15) . ? 
C63 C64 1.356(14) . ? 
C64 C65 1.358(14) . ? 
C65 C66 1.408(14) . ? 
C67 C68 1.368(13) . ? 
C67 C72 1.430(16) . ? 
C68 C69 1.376(14) . ? 
C69 C70 1.402(17) . ? 
C70 C71 1.385(16) . ? 
C71 C72 1.332(14) . ? 
C73 C74 1.529(13) . ? 
C74 C75 1.529(13) . ? 
C75 C76 1.518(11) . ? 
C77 C78 1.545(11) . ? 
C78 C79 1.543(13) . ? 
C79 C80 1.534(14) . ? 
C81 C82 1.355(16) . ? 
C82 C83 1.42(2) . ? 
C83 C84 1.38(2) . ? 
C84 C85 1.379(15) . ? 
C86 C87 1.390(16) . ? 
C87 C88 1.34(2) . ? 
C88 C89 1.45(2) . ? 
C89 C90 1.366(15) . ? 
C91 C92 1.336(18) . ? 
C92 C93 1.37(3) . ? 
C93 C94 1.35(2) . ? 
C94 C95 1.348(17) . ? 
C96 C97 1.387(14) . ? 
C97 C98 1.355(17) . ? 
C98 C99 1.333(16) . ? 
C99 C100 1.408(14) . ? 
C1S Cl2 1.701(19) . ? 
C1S Cl1 1.81(2) . ? 
C2S Cl3 1.550(18) . ? 
C2S Cl4 2.00(2) . ? 
C3S Cl6 1.51(4) . ? 
C3S Cl5 1.52(4) . ? 
C8SA O8SA 1.36(5) . ? 
C8SB O8SB 1.17(3) . ? 
Cl7 C4S 1.7803(16) . ? 
Cl8 C4S 1.7801(15) . ? 
Cl8 O9S 2.06(3) . ? 
 
loop_ 
 _geom_angle_atom_site_label_1 
 _geom_angle_atom_site_label_2 
 _geom_angle_atom_site_label_3 
 _geom_angle 
 _geom_angle_site_symmetry_1 
 _geom_angle_site_symmetry_3 
 _geom_angle_publ_flag 
C20 Rh1 O5 170.6(3) . . ? 
C20 Rh1 O1 86.5(3) . . ? 
O5 Rh1 O1 84.2(3) . . ? 
C20 Rh1 N1 98.2(3) . . ? 
O5 Rh1 N1 82.2(3) . . ? 
O1 Rh1 N1 85.2(3) . . ? 
C20 Rh1 P1 95.9(3) . . ? 
O5 Rh1 P1 93.3(2) . . ? 
O1 Rh1 P1 175.49(18) . . ? 
N1 Rh1 P1 98.2(2) . . ? 
C20 Rh1 Rh2 94.3(3) . . ? 
O5 Rh1 Rh2 83.96(18) . . ? 
O1 Rh1 Rh2 86.30(17) . . ? 
N1 Rh1 Rh2 164.4(2) . . ? 
P1 Rh1 Rh2 89.71(7) . . ? 
C2 Rh2 O6 83.1(3) . . ? 
C2 Rh2 O2 170.3(3) . . ? 
O6 Rh2 O2 87.4(2) . . ? 
C2 Rh2 P2 96.8(3) . . ? 
O6 Rh2 P2 175.77(18) . . ? 
O2 Rh2 P2 92.68(18) . . ? 
C2 Rh2 N2 98.7(4) . . ? 
O6 Rh2 N2 88.5(3) . . ? 
O2 Rh2 N2 82.3(3) . . ? 
P2 Rh2 N2 95.7(2) . . ? 
C2 Rh2 Rh1 94.0(3) . . ? 
O6 Rh2 Rh1 87.30(18) . . ? 
O2 Rh2 Rh1 84.10(17) . . ? 
P2 Rh2 Rh1 88.50(9) . . ? 
N2 Rh2 Rh1 166.0(2) . . ? 
C56 Rh3 O3 170.9(4) . . ? 
C56 Rh3 O7 85.1(4) . . ? 
O3 Rh3 O7 86.3(2) . . ? 
C56 Rh3 P3 97.7(3) . . ? 
O3 Rh3 P3 90.8(2) . . ? 
O7 Rh3 P3 175.33(16) . . ? 
C56 Rh3 N3 98.0(3) . . ? 
O3 Rh3 N3 84.6(3) . . ? 
O7 Rh3 N3 88.5(3) . . ? 
P3 Rh3 N3 94.8(2) . . ? 
C56 Rh3 Rh4 92.8(3) . . ? 
O3 Rh3 Rh4 84.04(17) . . ? 
O7 Rh3 Rh4 87.40(15) . . ? 
P3 Rh3 Rh4 88.72(7) . . ? 
N3 Rh3 Rh4 168.2(2) . . ? 
C38 Rh4 O8 169.4(3) . . ? 
C38 Rh4 O4 85.6(3) . . ? 
O8 Rh4 O4 84.1(2) . . ? 
C38 Rh4 P4 96.1(2) . . ? 
O8 Rh4 P4 93.95(19) . . ? 
O4 Rh4 P4 175.30(17) . . ? 
C38 Rh4 N4 99.3(3) . . ? 
O8 Rh4 N4 82.7(3) . . ? 
O4 Rh4 N4 87.4(2) . . ? 
P4 Rh4 N4 96.6(2) . . ? 
C38 Rh4 Rh3 94.0(2) . . ? 
O8 Rh4 Rh3 82.92(16) . . ? 
O4 Rh4 Rh3 86.12(17) . . ? 
P4 Rh4 Rh3 89.40(9) . . ? 
N4 Rh4 Rh3 164.8(2) . . ? 
C1 P1 C7 107.3(5) . . ? 
C1 P1 C13 103.2(4) . . ? 
C7 P1 C13 100.4(5) . . ? 
C1 P1 Rh1 108.0(4) . . ? 
C7 P1 Rh1 123.3(3) . . ? 
C13 P1 Rh1 112.8(4) . . ? 
C19 P2 C31 104.1(4) . . ? 
C19 P2 C25 107.2(4) . . ? 
C31 P2 C25 100.0(4) . . ? 
C19 P2 Rh2 109.3(3) . . ? 
C31 P2 Rh2 112.6(3) . . ? 
C25 P2 Rh2 122.0(3) . . ? 
C37 P3 C43 106.3(4) . . ? 
C37 P3 C49 102.8(4) . . ? 
C43 P3 C49 100.2(4) . . ? 
C37 P3 Rh3 110.2(3) . . ? 
C43 P3 Rh3 124.1(3) . . ? 
C49 P3 Rh3 110.9(4) . . ? 
C55 P4 C61 108.7(4) . . ? 
C55 P4 C67 103.2(4) . . ? 
C61 P4 C67 98.5(4) . . ? 
C55 P4 Rh4 108.3(3) . . ? 
C61 P4 Rh4 122.8(3) . . ? 
C67 P4 Rh4 113.5(3) . . ? 
C73 O1 Rh1 117.5(6) . . ? 
C73 O2 Rh2 118.4(6) . . ? 
C76 O3 Rh3 118.7(5) . . ? 
C76 O4 Rh4 115.0(5) . . ? 
C77 O5 Rh1 120.4(5) . . ? 
C77 O6 Rh2 115.2(6) . . ? 
C80 O7 Rh3 114.3(6) . . ? 
C80 O8 Rh4 122.1(6) . . ? 
C85 N1 C81 117.8(9) . . ? 
C85 N1 Rh1 116.3(7) . . ? 
C81 N1 Rh1 124.6(7) . . ? 
C90 N2 C86 116.2(10) . . ? 
C90 N2 Rh2 125.6(8) . . ? 
C86 N2 Rh2 115.9(7) . . ? 
C95 N3 C91 117.8(10) . . ? 
C95 N3 Rh3 123.5(8) . . ? 
C91 N3 Rh3 118.0(7) . . ? 
C100 N4 C96 120.2(9) . . ? 
C100 N4 Rh4 114.0(6) . . ? 
C96 N4 Rh4 124.1(7) . . ? 
C6 C1 C2 122.6(9) . . ? 
C6 C1 P1 119.8(8) . . ? 
C2 C1 P1 117.5(7) . . ? 
C3 C2 C1 115.2(8) . . ? 
C3 C2 Rh2 120.9(8) . . ? 
C1 C2 Rh2 123.2(7) . . ? 
C4 C3 C2 122.4(10) . . ? 
C5 C4 C3 122.3(10) . . ? 
C4 C5 C6 118.7(10) . . ? 
C1 C6 C5 118.6(10) . . ? 
C12 C7 C8 118.7(9) . . ? 
C12 C7 P1 119.1(8) . . ? 
C8 C7 P1 121.7(7) . . ? 
C9 C8 C7 121.0(10) . . ? 
C8 C9 C10 120.3(11) . . ? 
C11 C10 C9 119.3(10) . . ? 
C10 C11 C12 121.1(10) . . ? 
C7 C12 C11 119.6(11) . . ? 
C18 C13 C14 118.7(9) . . ? 
C18 C13 P1 120.0(9) . . ? 
C14 C13 P1 121.2(8) . . ? 
C13 C14 C15 118.2(11) . . ? 
C16 C15 C14 121.3(13) . . ? 
C15 C16 C17 119.1(10) . . ? 
C16 C17 C18 122.8(11) . . ? 
C17 C18 C13 119.7(12) . . ? 
C24 C19 C20 121.2(8) . . ? 
C24 C19 P2 121.6(7) . . ? 
C20 C19 P2 117.2(6) . . ? 
C21 C20 C19 116.5(7) . . ? 
C21 C20 Rh1 120.0(6) . . ? 
C19 C20 Rh1 123.1(6) . . ? 
C22 C21 C20 121.3(9) . . ? 
C23 C22 C21 121.7(9) . . ? 
C22 C23 C24 119.5(8) . . ? 
C23 C24 C19 119.6(9) . . ? 
C30 C25 C26 118.3(9) . . ? 
C30 C25 P2 123.3(7) . . ? 
C26 C25 P2 118.2(7) . . ? 
C27 C26 C25 119.3(9) . . ? 
C26 C27 C28 120.5(10) . . ? 
C29 C28 C27 119.5(11) . . ? 
C28 C29 C30 121.4(10) . . ? 
C29 C30 C25 121.0(9) . . ? 
C36 C31 C32 118.0(10) . . ? 
C36 C31 P2 122.9(9) . . ? 
C32 C31 P2 118.9(7) . . ? 
C33 C32 C31 119.2(11) . . ? 
C32 C33 C34 121.0(13) . . ? 
C35 C34 C33 119.6(12) . . ? 
C34 C35 C36 119.5(11) . . ? 
C31 C36 C35 122.5(11) . . ? 
C42 C37 C38 121.5(8) . . ? 
C42 C37 P3 123.5(7) . . ? 
C38 C37 P3 114.6(7) . . ? 
C39 C38 C37 114.4(8) . . ? 
C39 C38 Rh4 120.3(7) . . ? 
C37 C38 Rh4 124.8(6) . . ? 
C40 C39 C38 122.7(10) . . ? 
C39 C40 C41 121.1(9) . . ? 
C42 C41 C40 117.9(10) . . ? 
C41 C42 C37 122.4(10) . . ? 
C48 C43 C44 117.9(9) . . ? 
C48 C43 P3 121.8(7) . . ? 
C44 C43 P3 119.9(7) . . ? 
C43 C44 C45 120.0(9) . . ? 
C46 C45 C44 120.2(9) . . ? 
C47 C46 C45 120.7(10) . . ? 
C46 C47 C48 118.9(11) . . ? 
C43 C48 C47 122.2(9) . . ? 
C50 C49 C54 119.1(9) . . ? 
C50 C49 P3 121.1(7) . . ? 
C54 C49 P3 119.8(8) . . ? 
C49 C50 C51 121.0(10) . . ? 
C52 C51 C50 117.9(11) . . ? 
C53 C52 C51 120.2(11) . . ? 
C52 C53 C54 121.3(10) . . ? 
C49 C54 C53 120.5(10) . . ? 
C60 C55 C56 119.8(8) . . ? 
C60 C55 P4 123.2(8) . . ? 
C56 C55 P4 116.8(6) . . ? 
C57 C56 C55 117.3(8) . . ? 
C57 C56 Rh3 118.2(7) . . ? 
C55 C56 Rh3 123.2(6) . . ? 
C56 C57 C58 119.9(9) . . ? 
C59 C58 C57 122.5(9) . . ? 
C58 C59 C60 118.4(8) . . ? 
C55 C60 C59 121.8(9) . . ? 
C66 C61 C62 118.3(9) . . ? 
C66 C61 P4 120.1(7) . . ? 
C62 C61 P4 121.5(7) . . ? 
C63 C62 C61 119.3(9) . . ? 
C64 C63 C62 121.3(9) . . ? 
C63 C64 C65 120.4(10) . . ? 
C64 C65 C66 120.0(9) . . ? 
C61 C66 C65 120.4(9) . . ? 
C68 C67 C72 119.7(9) . . ? 
C68 C67 P4 123.0(8) . . ? 
C72 C67 P4 117.3(7) . . ? 
C67 C68 C69 119.1(11) . . ? 
C68 C69 C70 121.7(10) . . ? 
C71 C70 C69 117.5(10) . . ? 
C72 C71 C70 122.3(12) . . ? 
C71 C72 C67 119.7(10) . . ? 
O1 C73 O2 129.7(9) . . ? 
O1 C73 C74 116.3(8) . . ? 
O2 C73 C74 114.0(8) . . ? 
F6 C74 F5 105.6(7) . . ? 
F6 C74 C73 112.0(8) . . ? 
F5 C74 C73 106.5(7) . . ? 
F6 C74 C75 108.5(8) . . ? 
F5 C74 C75 106.3(8) . . ? 
C73 C74 C75 117.2(7) . . ? 
F8 C75 F7 106.7(8) . . ? 
F8 C75 C76 111.4(7) . . ? 
F7 C75 C76 106.7(8) . . ? 
F8 C75 C74 108.3(8) . . ? 
F7 C75 C74 108.7(7) . . ? 
C76 C75 C74 114.8(8) . . ? 
O3 C76 O4 130.3(7) . . ? 
O3 C76 C75 113.9(8) . . ? 
O4 C76 C75 115.7(7) . . ? 
O6 C77 O5 130.2(8) . . ? 
O6 C77 C78 118.9(8) . . ? 
O5 C77 C78 110.9(8) . . ? 
F2 C78 F1 106.8(7) . . ? 
F2 C78 C79 108.5(7) . . ? 
F1 C78 C79 108.5(7) . . ? 
F2 C78 C77 111.2(7) . . ? 
F1 C78 C77 106.4(8) . . ? 
C79 C78 C77 115.1(7) . . ? 
F3 C79 F4 105.4(6) . . ? 
F3 C79 C80 112.0(7) . . ? 
F4 C79 C80 107.6(7) . . ? 
F3 C79 C78 108.2(8) . . ? 
F4 C79 C78 106.6(7) . . ? 
C80 C79 C78 116.4(7) . . ? 
O7 C80 O8 129.1(9) . . ? 
O7 C80 C79 119.4(8) . . ? 
O8 C80 C79 111.3(8) . . ? 
N1 C81 C82 125.5(13) . . ? 
C81 C82 C83 114.4(14) . . ? 
C84 C83 C82 122.6(11) . . ? 
C85 C84 C83 115.6(13) . . ? 
N1 C85 C84 123.9(11) . . ? 
N2 C86 C87 125.2(12) . . ? 
C88 C87 C86 116.6(15) . . ? 
C87 C88 C89 119.5(12) . . ? 
C90 C89 C88 116.0(12) . . ? 
N2 C90 C89 126.4(13) . . ? 
N3 C91 C92 123.1(14) . . ? 
C91 C92 C93 119.8(16) . . ? 
C94 C93 C92 116.2(14) . . ? 
C95 C94 C93 120.3(16) . . ? 
N3 C95 C94 122.8(15) . . ? 
N4 C96 C97 121.5(11) . . ? 
C98 C97 C96 117.5(10) . . ? 
C99 C98 C97 121.7(10) . . ? 
C98 C99 C100 118.5(11) . . ? 
N4 C100 C99 120.4(9) . . ? 
Cl2 C1S Cl1 109.3(10) . . ? 
Cl3 C2S Cl4 106.5(10) . . ? 
Cl6 C3S Cl5 141(8) . . ? 
C4S Cl8 O9S 99.1(15) . . ? 
Cl8 C4S Cl7 107.8(5) . . ? 
 
loop_ 
 _geom_torsion_atom_site_label_1 
 _geom_torsion_atom_site_label_2 
 _geom_torsion_atom_site_label_3 
 _geom_torsion_atom_site_label_4 
 _geom_torsion 
 _geom_torsion_site_symmetry_1 
 _geom_torsion_site_symmetry_2 
 _geom_torsion_site_symmetry_3 
 _geom_torsion_site_symmetry_4 
 _geom_torsion_publ_flag 
P1 Rh1 Rh2 P2 75.66(10) . . . . ? 
C20 Rh1 Rh2 C2 -116.9(4) . . . . ? 
P1 Rh1 Rh2 C2 -21.0(3) . . . . ? 
C20 Rh1 Rh2 P2 -20.3(3) . . . . ? 
O1 Rh1 Rh2 O2 -13.6(2) . . . . ? 
O5 Rh1 Rh2 O6 -10.5(2) . . . . ? 
P3 Rh3 Rh4 P4 74.56(9) . . . . ? 
C56 Rh3 Rh4 C38 -119.2(4) . . . . ? 
P3 Rh3 Rh4 C38 -21.5(2) . . . . ? 
C56 Rh3 Rh4 P4 -23.1(3) . . . . ? 
O3 Rh3 Rh4 O4 -16.0(3) . . . . ? 
O7 Rh3 Rh4 O8 -14.0(2) . . . . ? 
 
_diffrn_measured_fraction_theta_max    0.926 
_diffrn_reflns_theta_full              28.00 
_diffrn_measured_fraction_theta_full   0.926 
_refine_diff_density_max    1.498 
_refine_diff_density_min   -1.164 
_refine_diff_density_rms    0.171 
#===END of CIF for Compound 1 ===============================
#========================================================================
# CIF for Compound 2.3.5CH2Cl2.2CH3OH
#========================================================================
 
data_compound_2
 
_audit_creation_method            SHELXL-97 
_chemical_name_systematic 
; 
 ? 
; 
_chemical_name_common             ? 
_chemical_melting_point           ? 
_chemical_formula_moiety          
 'Rh4 (C18 H14 P)4 (C5 F6 O4 )2 (C5 H5 N)4, 3.5CH2 Cl2 , 2CH3 OH' 
_chemical_formula_sum 
 'C107.50 H91 Cl7 F12 N4 O10 P4 Rh4' 
_chemical_formula_weight          2610.51 
 
loop_ 
 _atom_type_symbol 
 _atom_type_description 
 _atom_type_scat_dispersion_real 
 _atom_type_scat_dispersion_imag 
 _atom_type_scat_source 
 'C'  'C'   0.0033   0.0016 
 'International Tables Vol C Tables 4.2.6.8 and 6.1.1.4' 
 'H'  'H'   0.0000   0.0000 
 'International Tables Vol C Tables 4.2.6.8 and 6.1.1.4' 
 'O'  'O'   0.0106   0.0060 
 'International Tables Vol C Tables 4.2.6.8 and 6.1.1.4' 
 'F'  'F'   0.0171   0.0103 
 'International Tables Vol C Tables 4.2.6.8 and 6.1.1.4' 
 'P'  'P'   0.1023   0.0942 
 'International Tables Vol C Tables 4.2.6.8 and 6.1.1.4' 
 'Cl'  'Cl'   0.1484   0.1585 
 'International Tables Vol C Tables 4.2.6.8 and 6.1.1.4' 
 'Rh'  'Rh'  -1.1178   0.9187 
 'International Tables Vol C Tables 4.2.6.8 and 6.1.1.4' 
 'N'  'N'   0.0061   0.0033 
 'International Tables Vol C Tables 4.2.6.8 and 6.1.1.4' 
 
_symmetry_cell_setting            Monoclinic 
_symmetry_space_group_name_H-M    P2(1) 
 
loop_ 
 _symmetry_equiv_pos_as_xyz 
 'x, y, z' 
 '-x, y+1/2, -z' 
 
_cell_length_a                    12.971(3) 
_cell_length_b                    18.364(4) 
_cell_length_c                    23.397(5) 
_cell_angle_alpha                 90.00 
_cell_angle_beta                  105.347(4) 
_cell_angle_gamma                 90.00 
_cell_volume                      5374(2) 
_cell_formula_units_Z             2 
_cell_measurement_temperature     213(2) 
_cell_measurement_reflns_used     6414 
_cell_measurement_theta_min       2.18 
_cell_measurement_theta_max       26.76 
 
_exptl_crystal_description        block 
_exptl_crystal_colour             red 
_exptl_crystal_size_max           0.33 
_exptl_crystal_size_mid           0.28 
_exptl_crystal_size_min           0.14 
_exptl_crystal_density_meas       ? 
_exptl_crystal_density_diffrn     1.613 
_exptl_crystal_density_method     'not measured' 
_exptl_crystal_F_000              2622 
_exptl_absorpt_coefficient_mu     0.918 
_exptl_absorpt_correction_type    multi-scan 
_exptl_absorpt_correction_T_min   0.7516 
_exptl_absorpt_correction_T_max   0.8823 
_exptl_absorpt_process_details    sadabs 
 
_exptl_special_details 
; 
 ? 
; 
 
_diffrn_ambient_temperature       213(2) 
_diffrn_radiation_wavelength      0.71073 
_diffrn_radiation_type            MoK\a 
_diffrn_radiation_source          'normal-focus sealed tube' 
_diffrn_radiation_monochromator   graphite 
_diffrn_measurement_device_type   'Bruker SMART 1000' 
_diffrn_measurement_method        '\w scans' 
_diffrn_detector_area_resol_mean  0 
_diffrn_standards_number          0 
_diffrn_standards_interval_count  0 
_diffrn_standards_interval_time   0 
_diffrn_standards_decay_%         0 
_diffrn_reflns_number             34424 
_diffrn_reflns_av_R_equivalents   0.0329 
_diffrn_reflns_av_sigmaI/netI     0.0578 
_diffrn_reflns_limit_h_min        -16 
_diffrn_reflns_limit_h_max        16 
_diffrn_reflns_limit_k_min        -23 
_diffrn_reflns_limit_k_max        19 
_diffrn_reflns_limit_l_min        -30 
_diffrn_reflns_limit_l_max        24 
_diffrn_reflns_theta_min          1.63 
_diffrn_reflns_theta_max          27.50 
_reflns_number_total              18983 
_reflns_number_gt                 15721 
_reflns_threshold_expression      >2sigma(I) 
 
_computing_data_collection        SMART 
_computing_cell_refinement        SAINT 
_computing_data_reduction         SAINT 
_computing_structure_solution     'SHELXS-97 (Sheldrick, 1990)' 
_computing_structure_refinement   'SHELXL-97 (Sheldrick, 1997)' 
_computing_molecular_graphics     'SHELXTL (Siemens, 1996)' 
_computing_publication_material   CIFTAB
 
_refine_special_details 
; 
 Refinement of F^2^ against ALL reflections.  The weighted R-factor wR and 
 goodness of fit S are based on F^2^, conventional R-factors R are based 
 on F, with F set to zero for negative F^2^. The threshold expression of 
 F^2^ > 2sigma(F^2^) is used only for calculating R-factors(gt) etc. and is 
 not relevant to the choice of reflections for refinement.  R-factors based 
 on F^2^ are statistically about twice as large as those based on F, and R- 
 factors based on ALL data will be even larger. 
; 
 
_refine_ls_structure_factor_coef  Fsqd  
_refine_ls_matrix_type            full 
_refine_ls_weighting_scheme       calc  
_refine_ls_weighting_details 
 'calc w=1/[\s^2^(Fo^2^)+(0.0844P)^2^+3.9666P] where P=(Fo^2^+2Fc^2^)/3' 
_atom_sites_solution_primary      direct 
_atom_sites_solution_secondary    difmap 
_atom_sites_solution_hydrogens    geom 
_refine_ls_hydrogen_treatment     noref 
_refine_ls_extinction_method      none 
_refine_ls_extinction_coef        ? 
_refine_ls_abs_structure_details 
 'Flack H D (1983), Acta Cryst. A39, 876-881' 
_refine_ls_abs_structure_Flack    -0.01(3) 
_refine_ls_number_reflns          18983 
_refine_ls_number_parameters      1249 
_refine_ls_number_restraints      3 
_refine_ls_R_factor_all           0.0692 
_refine_ls_R_factor_gt            0.0549 
_refine_ls_wR_factor_ref          0.1487 
_refine_ls_wR_factor_gt           0.1381 
_refine_ls_goodness_of_fit_ref    1.057 
_refine_ls_restrained_S_all       1.057 
_refine_ls_shift/su_max           0.007 
_refine_ls_shift/su_mean          0.000 
 
loop_ 
 _atom_site_label 
 _atom_site_type_symbol 
 _atom_site_fract_x 
 _atom_site_fract_y 
 _atom_site_fract_z 
 _atom_site_U_iso_or_equiv 
 _atom_site_adp_type 
 _atom_site_occupancy 
 _atom_site_symmetry_multiplicity 
 _atom_site_calc_flag 
 _atom_site_refinement_flags 
 _atom_site_disorder_assembly 
 _atom_site_disorder_group 
Rh1 Rh 0.30868(4) 0.43672(4) 0.00846(2) 0.03248(13) Uani 1 1 d . . . 
Rh2 Rh 0.32653(4) 0.56723(4) 0.05082(2) 0.03293(14) Uani 1 1 d . . . 
Rh3 Rh 0.63443(4) 0.29679(3) 0.38864(2) 0.02637(12) Uani 1 1 d . . . 
Rh4 Rh 0.64144(4) 0.43337(3) 0.41553(2) 0.02415(11) Uani 1 1 d . . . 
P1 P 0.36728(15) 0.48158(11) -0.06533(8) 0.0306(4) Uani 1 1 d . . . 
P2 P 0.15190(15) 0.57846(15) 0.01085(9) 0.0421(5) Uani 1 1 d . . . 
P3 P 0.57129(14) 0.27831(10) 0.46645(8) 0.0274(4) Uani 1 1 d . . . 
P4 P 0.81458(14) 0.41945(10) 0.45585(8) 0.0299(4) Uani 1 1 d . . . 
F1 F 0.6952(4) 0.5202(4) 0.1340(2) 0.0583(15) Uani 1 1 d . A . 
F2 F 0.6807(4) 0.4060(3) 0.1116(2) 0.0525(14) Uani 1 1 d . A . 
F11 F 0.2631(3) 0.4369(3) 0.3256(2) 0.0553(13) Uani 1 1 d . B . 
F12 F 0.2647(3) 0.3290(3) 0.28908(19) 0.0397(10) Uani 1 1 d . B . 
O1 O 0.4674(4) 0.4215(3) 0.0712(2) 0.0398(13) Uani 1 1 d . . . 
O2 O 0.4946(4) 0.5432(3) 0.0842(2) 0.0415(14) Uani 1 1 d . . . 
O3 O 0.6949(4) 0.3295(3) 0.3137(2) 0.0394(13) Uani 1 1 d . A . 
O4 O 0.6619(4) 0.4485(3) 0.3270(2) 0.0360(12) Uani 1 1 d . A . 
O5 O 0.2497(4) 0.4075(3) 0.0842(2) 0.0415(13) Uani 1 1 d . B . 
O6 O 0.3091(5) 0.5129(4) 0.1315(2) 0.0528(17) Uani 1 1 d . B . 
O7 O 0.4770(4) 0.3235(3) 0.3310(2) 0.0335(11) Uani 1 1 d . . . 
O8 O 0.4694(3) 0.4324(3) 0.37357(19) 0.0269(9) Uani 1 1 d . . . 
N1 N 0.3178(5) 0.3157(4) -0.0063(3) 0.0433(17) Uani 1 1 d . . . 
N3 N 0.5919(5) 0.1894(4) 0.3383(3) 0.0403(15) Uani 1 1 d . . . 
N4 N 0.6238(5) 0.5563(4) 0.4071(3) 0.0382(15) Uani 1 1 d . . . 
C1 C 0.3576(6) 0.5798(4) -0.0713(3) 0.0323(15) Uani 1 1 d . . . 
C2 C 0.3527(6) 0.6173(4) -0.0202(3) 0.0329(16) Uani 1 1 d . . . 
C3 C 0.3665(8) 0.6926(5) -0.0210(4) 0.048(2) Uani 1 1 d . . . 
H3A H 0.3671 0.7194 0.0133 0.058 Uiso 1 1 calc R . . 
C4 C 0.3797(8) 0.7302(5) -0.0711(4) 0.052(2) Uani 1 1 d . . . 
H4A H 0.3940 0.7804 -0.0694 0.063 Uiso 1 1 calc R . . 
C5 C 0.3710(8) 0.6910(5) -0.1235(4) 0.048(2) Uani 1 1 d . . . 
H5A H 0.3712 0.7156 -0.1588 0.058 Uiso 1 1 calc R . . 
C6 C 0.3624(7) 0.6174(5) -0.1232(4) 0.0410(19) Uani 1 1 d . . . 
H6A H 0.3596 0.5910 -0.1580 0.049 Uiso 1 1 calc R . . 
C7 C 0.3071(6) 0.4501(4) -0.1415(3) 0.0358(17) Uani 1 1 d . . . 
C8 C 0.2017(7) 0.4737(5) -0.1695(4) 0.045(2) Uani 1 1 d . . . 
H8A H 0.1660 0.5053 -0.1494 0.053 Uiso 1 1 calc R . . 
C9 C 0.1514(8) 0.4504(6) -0.2261(4) 0.058(3) Uani 1 1 d . . . 
H9A H 0.0805 0.4643 -0.2441 0.070 Uiso 1 1 calc R . . 
C10 C 0.2047(9) 0.4075(6) -0.2553(5) 0.063(3) Uani 1 1 d . . . 
H10A H 0.1704 0.3936 -0.2943 0.076 Uiso 1 1 calc R . . 
C11 C 0.3075(10) 0.3831(6) -0.2304(5) 0.066(3) Uani 1 1 d . . . 
H11A H 0.3422 0.3525 -0.2516 0.079 Uiso 1 1 calc R . . 
C12 C 0.3585(8) 0.4055(5) -0.1721(4) 0.051(2) Uani 1 1 d . . . 
H12A H 0.4284 0.3896 -0.1541 0.061 Uiso 1 1 calc R . . 
C13 C 0.5110(6) 0.4647(5) -0.0586(3) 0.0372(17) Uani 1 1 d . . . 
C14 C 0.5719(8) 0.5121(5) -0.0827(5) 0.059(3) Uani 1 1 d . . . 
H14A H 0.5410 0.5544 -0.1027 0.071 Uiso 1 1 calc R . . 
C15 C 0.6795(9) 0.4962(6) -0.0768(6) 0.067(3) Uani 1 1 d . . . 
H15A H 0.7198 0.5283 -0.0936 0.081 Uiso 1 1 calc R . . 
C16 C 0.7282(7) 0.4363(6) -0.0478(4) 0.053(2) Uani 1 1 d . . . 
H16A H 0.8012 0.4277 -0.0437 0.064 Uiso 1 1 calc R . . 
C17 C 0.6688(8) 0.3885(6) -0.0246(4) 0.054(2) Uani 1 1 d . . . 
H17A H 0.7012 0.3464 -0.0050 0.065 Uiso 1 1 calc R . . 
C18 C 0.5594(7) 0.4019(5) -0.0301(4) 0.045(2) Uani 1 1 d . . . 
H18A H 0.5191 0.3685 -0.0144 0.054 Uiso 1 1 calc R . . 
C19 C 0.0988(7) 0.5110(5) -0.0454(4) 0.043(2) Uani 1 1 d . . . 
C20 C 0.1581(6) 0.4474(5) -0.0434(3) 0.0396(19) Uani 1 1 d . . . 
C21 C 0.1066(7) 0.3886(5) -0.0798(4) 0.046(2) Uani 1 1 d . . . 
H21A H 0.1420 0.3437 -0.0783 0.055 Uiso 1 1 calc R . . 
C22 C 0.0043(7) 0.3971(6) -0.1178(4) 0.053(2) Uani 1 1 d . . . 
H22A H -0.0283 0.3578 -0.1416 0.063 Uiso 1 1 calc R . . 
C23 C -0.0495(6) 0.4625(7) -0.1209(4) 0.061(3) Uani 1 1 d . . . 
H23A H -0.1176 0.4680 -0.1473 0.074 Uiso 1 1 calc R . . 
C24 C -0.0039(7) 0.5184(6) -0.0857(4) 0.054(2) Uani 1 1 d . . . 
H24A H -0.0406 0.5629 -0.0880 0.065 Uiso 1 1 calc R . . 
C25 C 0.0734(6) 0.5642(7) 0.0652(4) 0.059(3) Uani 1 1 d . . . 
C26 C 0.0964(9) 0.6023(10) 0.1170(5) 0.096(5) Uani 1 1 d . . . 
H26A H 0.1530 0.6360 0.1250 0.115 Uiso 1 1 calc R . . 
C27 C 0.0376(10) 0.5921(11) 0.1582(6) 0.115(7) Uani 1 1 d . . . 
H27A H 0.0579 0.6162 0.1949 0.138 Uiso 1 1 calc R . . 
C28 C -0.0496(9) 0.5471(9) 0.1455(5) 0.090(5) Uani 1 1 d . . . 
H28A H -0.0924 0.5424 0.1721 0.108 Uiso 1 1 calc R . . 
C29 C -0.0725(10) 0.5101(10) 0.0942(6) 0.093(5) Uani 1 1 d . . . 
H29A H -0.1319 0.4787 0.0853 0.111 Uiso 1 1 calc R . . 
C30 C -0.0114(8) 0.5166(7) 0.0539(5) 0.070(3) Uani 1 1 d . . . 
H30A H -0.0279 0.4885 0.0191 0.084 Uiso 1 1 calc R . . 
C31 C 0.0969(7) 0.6660(6) -0.0258(5) 0.055(2) Uani 1 1 d . . . 
C32 C 0.0380(9) 0.7132(8) -0.0001(6) 0.088(4) Uani 1 1 d . . . 
H32A H 0.0238 0.7008 0.0361 0.105 Uiso 1 1 calc R . . 
C33 C 0.0002(12) 0.7784(10) -0.0276(7) 0.113(6) Uani 1 1 d . . . 
H33A H -0.0411 0.8100 -0.0111 0.135 Uiso 1 1 calc R . . 
C34 C 0.0238(11) 0.7954(9) -0.0786(7) 0.103(5) Uani 1 1 d . . . 
H34A H -0.0005 0.8402 -0.0968 0.123 Uiso 1 1 calc R . . 
C35 C 0.0821(10) 0.7504(7) -0.1054(6) 0.081(4) Uani 1 1 d . . . 
H35A H 0.0980 0.7636 -0.1409 0.097 Uiso 1 1 calc R . . 
C36 C 0.1166(8) 0.6841(6) -0.0774(5) 0.062(3) Uani 1 1 d . . . 
H36A H 0.1545 0.6514 -0.0953 0.075 Uiso 1 1 calc R . . 
C37 C 0.5933(5) 0.3540(4) 0.5176(3) 0.0303(15) Uani 1 1 d . . . 
C38 C 0.6173(5) 0.4221(4) 0.4966(3) 0.0278(15) Uani 1 1 d . . . 
C39 C 0.6232(6) 0.4819(4) 0.5352(3) 0.0342(16) Uani 1 1 d . . . 
H39A H 0.6391 0.5283 0.5229 0.041 Uiso 1 1 calc R . . 
C40 C 0.6064(7) 0.4742(5) 0.5901(3) 0.0396(18) Uani 1 1 d . . . 
H40A H 0.6094 0.5155 0.6142 0.048 Uiso 1 1 calc R . . 
C41 C 0.5847(8) 0.4060(5) 0.6112(4) 0.048(2) Uani 1 1 d . . . 
H41A H 0.5749 0.4009 0.6494 0.058 Uiso 1 1 calc R . . 
C42 C 0.5783(7) 0.3469(5) 0.5744(4) 0.0422(19) Uani 1 1 d . . . 
H42A H 0.5636 0.3007 0.5876 0.051 Uiso 1 1 calc R . . 
C43 C 0.6221(6) 0.2009(4) 0.5151(3) 0.0319(15) Uani 1 1 d . . . 
C44 C 0.7233(7) 0.2061(5) 0.5535(4) 0.049(2) Uani 1 1 d . . . 
H44A H 0.7615 0.2498 0.5550 0.058 Uiso 1 1 calc R . . 
C45 C 0.7708(8) 0.1480(5) 0.5905(4) 0.056(2) Uani 1 1 d . . . 
H45A H 0.8396 0.1525 0.6164 0.067 Uiso 1 1 calc R . . 
C46 C 0.7132(8) 0.0843(5) 0.5874(4) 0.054(2) Uani 1 1 d . . . 
H46A H 0.7440 0.0449 0.6116 0.065 Uiso 1 1 calc R . . 
C47 C 0.6130(7) 0.0766(5) 0.5505(4) 0.046(2) Uani 1 1 d . . . 
H47A H 0.5754 0.0326 0.5491 0.056 Uiso 1 1 calc R . . 
C48 C 0.5671(7) 0.1358(4) 0.5146(4) 0.0380(17) Uani 1 1 d . . . 
H48A H 0.4975 0.1313 0.4896 0.046 Uiso 1 1 calc R . . 
C49 C 0.4249(6) 0.2681(4) 0.4455(3) 0.0342(16) Uani 1 1 d . . . 
C50 C 0.3587(6) 0.3186(4) 0.4621(4) 0.0386(18) Uani 1 1 d . . . 
H50A H 0.3897 0.3588 0.4852 0.046 Uiso 1 1 calc R . . 
C51 C 0.2487(6) 0.3116(5) 0.4460(4) 0.045(2) Uani 1 1 d . . . 
H51A H 0.2056 0.3474 0.4568 0.054 Uiso 1 1 calc R . . 
C52 C 0.2041(7) 0.2525(6) 0.4142(4) 0.054(2) Uani 1 1 d . . . 
H52A H 0.1294 0.2468 0.4045 0.064 Uiso 1 1 calc R . . 
C53 C 0.2660(7) 0.1997(6) 0.3956(4) 0.048(2) Uani 1 1 d . . . 
H53A H 0.2336 0.1587 0.3741 0.058 Uiso 1 1 calc R . . 
C54 C 0.3758(6) 0.2089(5) 0.4095(4) 0.0401(18) Uani 1 1 d . . . 
H54A H 0.4180 0.1757 0.3950 0.048 Uiso 1 1 calc R . . 
C55 C 0.8542(6) 0.3254(4) 0.4690(4) 0.0350(17) Uani 1 1 d . . . 
C56 C 0.7826(6) 0.2729(4) 0.4383(3) 0.0333(16) Uani 1 1 d . . . 
C57 C 0.8206(6) 0.2000(5) 0.4451(4) 0.0419(19) Uani 1 1 d . . . 
H57A H 0.7776 0.1631 0.4232 0.050 Uiso 1 1 calc R . . 
C58 C 0.9188(7) 0.1813(5) 0.4829(4) 0.051(2) Uani 1 1 d . . . 
H58A H 0.9383 0.1320 0.4886 0.061 Uiso 1 1 calc R . . 
C59 C 0.9879(7) 0.2344(6) 0.5120(5) 0.056(3) Uani 1 1 d . . . 
H59A H 1.0556 0.2218 0.5362 0.068 Uiso 1 1 calc R . . 
C60 C 0.9562(6) 0.3068(5) 0.5051(4) 0.046(2) Uani 1 1 d . . . 
H60A H 1.0029 0.3435 0.5246 0.055 Uiso 1 1 calc R . . 
C61 C 0.8718(5) 0.4616(4) 0.5288(3) 0.0338(16) Uani 1 1 d . . . 
C62 C 0.9161(6) 0.5310(4) 0.5369(4) 0.0383(17) Uani 1 1 d . . . 
H62A H 0.9256 0.5566 0.5039 0.046 Uiso 1 1 calc R . . 
C63 C 0.9466(7) 0.5635(5) 0.5918(4) 0.0458(19) Uani 1 1 d . . . 
H63A H 0.9735 0.6113 0.5955 0.055 Uiso 1 1 calc R . . 
C64 C 0.9379(7) 0.5263(5) 0.6412(4) 0.050(2) Uani 1 1 d . . . 
H64A H 0.9603 0.5477 0.6790 0.060 Uiso 1 1 calc R . . 
C65 C 0.8950(7) 0.4556(6) 0.6345(4) 0.054(2) Uani 1 1 d . . . 
H65A H 0.8903 0.4293 0.6682 0.064 Uiso 1 1 calc R . . 
C66 C 0.8601(6) 0.4244(5) 0.5799(4) 0.044(2) Uani 1 1 d . . . 
H66A H 0.8281 0.3781 0.5761 0.053 Uiso 1 1 calc R . . 
C67 C 0.8977(5) 0.4522(5) 0.4088(3) 0.0389(19) Uani 1 1 d . . . 
C68 C 0.8915(7) 0.5246(6) 0.3899(4) 0.051(2) Uani 1 1 d . . . 
H68A H 0.8436 0.5563 0.4014 0.061 Uiso 1 1 calc R . . 
C69 C 0.9539(7) 0.5511(6) 0.3548(5) 0.058(3) Uani 1 1 d . . . 
H69A H 0.9503 0.6006 0.3442 0.070 Uiso 1 1 calc R . . 
C70 C 1.0194(7) 0.5061(7) 0.3359(4) 0.061(3) Uani 1 1 d . . . 
H70A H 1.0608 0.5238 0.3115 0.073 Uiso 1 1 calc R . . 
C71 C 1.0261(7) 0.4326(7) 0.3527(5) 0.066(3) Uani 1 1 d . . . 
H71A H 1.0721 0.4014 0.3392 0.079 Uiso 1 1 calc R . . 
C72 C 0.9662(7) 0.4053(5) 0.3887(4) 0.050(2) Uani 1 1 d . . . 
H72A H 0.9712 0.3559 0.3996 0.059 Uiso 1 1 calc R . . 
C73 C 0.5200(6) 0.4774(5) 0.0918(4) 0.041(2) Uani 1 1 d . A . 
C74 C 0.6341(6) 0.4622(5) 0.1326(4) 0.041(2) Uani 1 1 d . . . 
C81 C 0.3187(5) 0.3933(4) 0.2989(3) 0.0329(16) Uani 1 1 d . . . 
C82 C 0.4349(5) 0.3814(4) 0.3389(3) 0.0256(14) Uani 1 1 d . B . 
C83 C 0.3314(11) 0.2821(6) -0.0551(5) 0.075(3) Uani 1 1 d . . . 
H83A H 0.3355 0.3123 -0.0869 0.089 Uiso 1 1 calc R . . 
C84 C 0.3396(10) 0.2092(6) -0.0634(5) 0.071(3) Uani 1 1 d . . . 
H84A H 0.3445 0.1902 -0.0999 0.085 Uiso 1 1 calc R . . 
C85 C 0.3405(14) 0.1654(8) -0.0172(8) 0.104(5) Uani 1 1 d . . . 
H85A H 0.3473 0.1148 -0.0207 0.124 Uiso 1 1 calc R . . 
C86 C 0.3315(16) 0.1949(6) 0.0350(8) 0.118(7) Uani 1 1 d . . . 
H86A H 0.3303 0.1650 0.0675 0.141 Uiso 1 1 calc R . . 
C87 C 0.3243(11) 0.2694(6) 0.0387(5) 0.073(3) Uani 1 1 d . . . 
H87A H 0.3238 0.2893 0.0757 0.087 Uiso 1 1 calc R . . 
N2 N 0.3635(5) 0.6679(3) 0.1111(2) 0.0459(17) Uani 1 1 d G . . 
C88 C 0.4588(5) 0.6667(4) 0.1556(3) 0.075(3) Uani 1 1 d G . . 
H88A H 0.5048 0.6263 0.1594 0.090 Uiso 1 1 calc R . . 
C89 C 0.4863(6) 0.7251(5) 0.1944(3) 0.106(5) Uani 1 1 d G . . 
H89A H 0.5507 0.7243 0.2245 0.127 Uiso 1 1 calc R . . 
C90 C 0.4184(8) 0.7847(4) 0.1888(4) 0.108(5) Uani 1 1 d G . . 
H90A H 0.4369 0.8243 0.2150 0.130 Uiso 1 1 calc R . . 
C91 C 0.3230(8) 0.7860(4) 0.1443(4) 0.089(4) Uani 1 1 d G . . 
H91A H 0.2771 0.8263 0.1404 0.107 Uiso 1 1 calc R . . 
C92 C 0.2956(5) 0.7275(4) 0.1054(3) 0.079(4) Uani 1 1 d G . . 
H92A H 0.2311 0.7284 0.0754 0.095 Uiso 1 1 calc R . . 
C93 C 0.5923(7) 0.1214(5) 0.3608(4) 0.047(2) Uani 1 1 d . . . 
H93A H 0.6171 0.1159 0.4021 0.056 Uiso 1 1 calc R . . 
C94 C 0.5592(8) 0.0598(6) 0.3276(5) 0.057(2) Uani 1 1 d . . . 
H94A H 0.5640 0.0136 0.3454 0.069 Uiso 1 1 calc R . . 
C95 C 0.5185(8) 0.0686(7) 0.2672(5) 0.071(3) Uani 1 1 d . . . 
H95A H 0.4946 0.0279 0.2429 0.085 Uiso 1 1 calc R . . 
C96 C 0.5131(7) 0.1367(6) 0.2427(4) 0.050(2) Uani 1 1 d . . . 
H96A H 0.4838 0.1434 0.2018 0.060 Uiso 1 1 calc R . . 
C97 C 0.5514(6) 0.1958(5) 0.2790(3) 0.0397(18) Uani 1 1 d . . . 
H97A H 0.5490 0.2422 0.2618 0.048 Uiso 1 1 calc R . . 
C98 C 0.5542(6) 0.5785(5) 0.3571(4) 0.0426(19) Uani 1 1 d . . . 
H98A H 0.5138 0.5436 0.3312 0.051 Uiso 1 1 calc R . . 
C99 C 0.5396(8) 0.6538(6) 0.3421(5) 0.062(3) Uani 1 1 d . . . 
H99A H 0.4891 0.6679 0.3071 0.075 Uiso 1 1 calc R . . 
C100 C 0.5977(8) 0.7047(5) 0.3778(5) 0.058(3) Uani 1 1 d . . . 
H10B H 0.5881 0.7544 0.3683 0.070 Uiso 1 1 calc R . . 
C101 C 0.6730(8) 0.6821(5) 0.4295(5) 0.054(2) Uani 1 1 d . . . 
H10C H 0.7169 0.7161 0.4547 0.065 Uiso 1 1 calc R . . 
C102 C 0.6812(6) 0.6101(4) 0.4424(4) 0.0364(17) Uani 1 1 d . . . 
H10D H 0.7297 0.5958 0.4781 0.044 Uiso 1 1 calc R . . 
C75 C 0.6196(8) 0.4367(7) 0.1930(4) 0.013(2) Uiso 0.553(17) 1 d P A 1 
C76 C 0.7235(8) 0.4223(6) 0.2436(4) 0.012(2) Uiso 0.553(17) 1 d P A 1 
F3 F 0.5605(9) 0.4868(7) 0.2095(4) 0.046(3) Uiso 0.553(17) 1 d P A 1 
F4 F 0.5520(7) 0.3847(6) 0.1911(4) 0.035(2) Uiso 0.553(17) 1 d P A 1 
F5 F 0.7901(7) 0.4749(5) 0.2532(4) 0.033(2) Uiso 0.553(17) 1 d P A 1 
F6 F 0.7831(9) 0.3744(6) 0.2285(5) 0.039(3) Uiso 0.553(17) 1 d P A 1 
C75B C 0.647(3) 0.4624(18) 0.2010(13) 0.073(8) Uiso 0.447(17) 1 d P A 2 
F3B F 0.5840(8) 0.5098(6) 0.2149(4) 0.019(2) Uiso 0.447(17) 1 d P A 2 
F4B F 0.7586(15) 0.5004(12) 0.2405(8) 0.079(5) Uiso 0.447(17) 1 d P A 2 
C76B C 0.684(3) 0.3997(18) 0.2325(13) 0.077(8) Uiso 0.447(17) 1 d P A 2 
F5B F 0.7570(9) 0.3565(7) 0.2198(5) 0.029(3) Uiso 0.447(17) 1 d P A 2 
F6B F 0.5828(9) 0.3583(7) 0.1881(5) 0.037(3) Uiso 0.447(17) 1 d P A 2 
C77 C 0.6883(6) 0.3951(5) 0.2999(3) 0.0375(19) Uani 1 1 d . . . 
C78 C 0.2738(7) 0.4490(6) 0.1276(4) 0.052(3) Uani 1 1 d . . . 
C79 C 0.2802(12) 0.3991(9) 0.1867(7) 0.034(4) Uiso 0.494(12) 1 d P B 1 
F7 F 0.1843(9) 0.3618(7) 0.1747(4) 0.038(3) Uiso 0.494(12) 1 d P B 1 
F8 F 0.3451(9) 0.3395(6) 0.1948(5) 0.042(3) Uiso 0.494(12) 1 d P B 1 
C80 C 0.3091(12) 0.4413(10) 0.2423(7) 0.035(3) Uiso 0.494(12) 1 d P B 1 
F10 F 0.2369(10) 0.4965(7) 0.2392(5) 0.058(3) Uiso 0.494(12) 1 d P B 1 
F9 F 0.3906(8) 0.4827(6) 0.2496(4) 0.033(2) Uiso 0.494(12) 1 d P B 1 
C79B C 0.2342(11) 0.4365(10) 0.1853(6) 0.036(3) Uiso 0.506(12) 1 d P B 2 
F7B F 0.1623(8) 0.3853(7) 0.1757(4) 0.036(2) Uiso 0.506(12) 1 d P B 2 
F8B F 0.1782(9) 0.4856(6) 0.2050(5) 0.053(3) Uiso 0.506(12) 1 d P B 2 
C80B C 0.3310(12) 0.4095(9) 0.2334(7) 0.030(3) Uiso 0.506(12) 1 d P B 2 
F9B F 0.4109(8) 0.4607(6) 0.2430(4) 0.037(3) Uiso 0.506(12) 1 d P B 2 
F10B F 0.3824(11) 0.3608(8) 0.2117(6) 0.066(4) Uiso 0.506(12) 1 d P B 2 
C1S C 0.1837(9) 0.4580(6) 0.5886(5) 0.064(3) Uiso 1 1 d . . . 
H1SA H 0.1062 0.4532 0.5823 0.076 Uiso 1 1 calc R . . 
H1SB H 0.2113 0.4886 0.6236 0.076 Uiso 1 1 calc R . . 
C2S C 0.1532(11) 0.7084(8) 0.7124(7) 0.094(4) Uiso 1 1 d . . . 
H2SA H 0.2027 0.7342 0.7451 0.112 Uiso 1 1 calc R . . 
H2SB H 0.1637 0.7280 0.6754 0.112 Uiso 1 1 calc R . . 
C3S C 0.7821(14) 0.6662(10) 0.7712(8) 0.118(5) Uiso 1 1 d . . . 
H3SA H 0.7232 0.6953 0.7470 0.141 Uiso 1 1 calc R . . 
H3SB H 0.8491 0.6876 0.7673 0.141 Uiso 1 1 calc R . . 
C5S C 0.7696(16) 0.6864(12) 0.2771(10) 0.132(6) Uiso 1 1 d . . . 
C6S C -0.0302(13) 0.7589(10) 0.3175(8) 0.106(5) Uiso 1 1 d . . . 
Cl1 Cl 0.2450(3) 0.3699(2) 0.60079(17) 0.0924(10) Uiso 1 1 d . . . 
Cl2 Cl 0.2103(3) 0.4982(3) 0.52765(19) 0.1062(12) Uiso 1 1 d . . . 
Cl3 Cl 0.1887(3) 0.6173(2) 0.71692(16) 0.0853(9) Uiso 1 1 d . . . 
Cl4 Cl 0.0246(3) 0.7284(2) 0.71478(18) 0.1016(11) Uiso 1 1 d . . . 
Cl5 Cl 0.7791(3) 0.6719(3) 0.8453(2) 0.1103(12) Uiso 1 1 d . . . 
Cl6 Cl 0.7719(4) 0.5800(3) 0.7443(2) 0.1170(13) Uiso 1 1 d . . . 
O5S O 0.7980(9) 0.6833(6) 0.2325(5) 0.112(3) Uiso 1 1 d . . . 
O6S O -0.0305(12) 0.7446(9) 0.2632(7) 0.156(5) Uiso 1 1 d . . . 
Cl7 Cl 0.2107(8) 0.8452(6) 0.2529(4) 0.124(3) Uiso 0.50 1 d PD . . 
Cl8 Cl 0.2439(10) 0.6823(7) 0.2590(6) 0.158(4) Uiso 0.50 1 d PD . . 
C4S C 0.207(6) 0.7623(9) 0.261(3) 0.27(4) Uiso 0.50 1 d PD . . 
H4SB H 0.1326 0.7552 0.2383 0.326 Uiso 0.50 1 calc PR . . 
H4SC H 0.2037 0.7625 0.3021 0.326 Uiso 0.50 1 calc PR . . 
 
loop_ 
 _atom_site_aniso_label 
 _atom_site_aniso_U_11 
 _atom_site_aniso_U_22 
 _atom_site_aniso_U_33 
 _atom_site_aniso_U_23 
 _atom_site_aniso_U_13 
 _atom_site_aniso_U_12 
Rh1 0.0294(3) 0.0386(3) 0.0289(3) 0.0086(3) 0.0067(2) -0.0021(3) 
Rh2 0.0284(3) 0.0434(4) 0.0263(3) 0.0035(3) 0.0061(2) -0.0006(3) 
Rh3 0.0271(2) 0.0243(3) 0.0271(3) -0.0021(2) 0.0061(2) 0.0020(2) 
Rh4 0.0222(2) 0.0225(3) 0.0265(2) 0.0004(2) 0.00431(18) 0.0017(2) 
P1 0.0339(9) 0.0280(10) 0.0308(9) 0.0053(7) 0.0100(7) 0.0015(8) 
P2 0.0298(9) 0.0657(16) 0.0304(10) -0.0027(10) 0.0074(8) 0.0060(10) 
P3 0.0286(8) 0.0255(10) 0.0272(9) -0.0015(7) 0.0060(7) -0.0018(7) 
P4 0.0226(8) 0.0279(11) 0.0368(10) 0.0018(7) 0.0035(7) 0.0003(7) 
F1 0.030(2) 0.087(4) 0.055(3) -0.004(3) 0.006(2) -0.007(3) 
F2 0.044(3) 0.075(4) 0.042(3) 0.005(2) 0.017(2) 0.023(3) 
F11 0.028(2) 0.052(3) 0.084(4) -0.012(3) 0.009(2) 0.012(2) 
F12 0.032(2) 0.042(3) 0.039(2) 0.0005(19) -0.0011(18) -0.018(2) 
O1 0.034(3) 0.036(3) 0.047(3) 0.011(2) 0.005(2) -0.001(2) 
O2 0.026(2) 0.056(4) 0.038(3) 0.015(3) 0.002(2) -0.006(2) 
O3 0.042(3) 0.046(4) 0.032(3) 0.001(2) 0.012(2) 0.016(3) 
O4 0.040(3) 0.034(3) 0.037(3) 0.010(2) 0.014(2) 0.006(2) 
O5 0.039(3) 0.055(4) 0.028(3) 0.005(2) 0.004(2) -0.013(3) 
O6 0.064(4) 0.066(4) 0.028(3) -0.005(3) 0.014(3) -0.030(3) 
O7 0.036(3) 0.033(3) 0.031(3) -0.007(2) 0.008(2) 0.002(2) 
O8 0.025(2) 0.026(2) 0.029(2) -0.004(2) 0.0046(17) -0.001(2) 
N1 0.040(4) 0.034(4) 0.056(4) 0.016(3) 0.014(3) -0.004(3) 
N3 0.044(4) 0.038(4) 0.042(4) -0.004(3) 0.018(3) 0.003(3) 
N4 0.031(3) 0.027(4) 0.052(4) -0.003(3) 0.003(3) 0.005(3) 
C1 0.036(4) 0.028(4) 0.035(4) 0.007(3) 0.014(3) 0.006(3) 
C2 0.034(4) 0.026(4) 0.035(4) 0.006(3) 0.003(3) 0.005(3) 
C3 0.067(6) 0.039(5) 0.038(5) 0.004(4) 0.012(4) 0.006(4) 
C4 0.077(6) 0.023(4) 0.059(6) 0.007(4) 0.025(5) 0.005(4) 
C5 0.067(6) 0.046(5) 0.032(4) 0.013(4) 0.015(4) 0.006(4) 
C6 0.051(5) 0.041(5) 0.032(4) 0.009(3) 0.014(4) 0.010(4) 
C7 0.046(4) 0.029(4) 0.032(4) 0.007(3) 0.010(3) -0.003(3) 
C8 0.053(5) 0.046(5) 0.033(4) 0.010(4) 0.009(4) 0.004(4) 
C9 0.056(5) 0.074(7) 0.036(4) 0.012(4) -0.002(4) -0.004(5) 
C10 0.075(7) 0.061(7) 0.049(6) -0.008(5) 0.008(5) -0.021(6) 
C11 0.090(8) 0.062(7) 0.051(6) -0.013(5) 0.029(6) -0.004(6) 
C12 0.066(6) 0.042(5) 0.045(5) -0.001(4) 0.014(4) -0.001(4) 
C13 0.036(4) 0.042(5) 0.037(4) 0.001(3) 0.017(3) 0.002(3) 
C14 0.050(5) 0.037(5) 0.098(8) 0.007(5) 0.031(5) 0.000(4) 
C15 0.063(6) 0.039(6) 0.111(9) 0.007(6) 0.043(6) -0.009(5) 
C16 0.039(4) 0.055(6) 0.068(6) 0.003(5) 0.019(4) 0.006(5) 
C17 0.054(5) 0.052(6) 0.062(6) 0.011(5) 0.025(5) 0.016(5) 
C18 0.047(5) 0.042(5) 0.052(5) 0.014(4) 0.024(4) 0.010(4) 
C19 0.039(4) 0.056(6) 0.033(4) 0.002(4) 0.011(3) -0.006(4) 
C20 0.034(3) 0.054(6) 0.030(4) 0.009(3) 0.006(3) -0.006(4) 
C21 0.048(5) 0.046(5) 0.042(5) 0.003(4) 0.010(4) -0.009(4) 
C22 0.042(5) 0.061(6) 0.050(5) -0.005(4) 0.004(4) -0.020(5) 
C23 0.025(4) 0.098(9) 0.050(5) 0.005(5) -0.009(4) 0.002(5) 
C24 0.038(4) 0.076(7) 0.048(5) -0.003(5) 0.012(4) 0.007(5) 
C25 0.030(4) 0.106(9) 0.043(5) -0.013(6) 0.011(3) 0.006(5) 
C26 0.057(6) 0.192(17) 0.041(6) -0.035(7) 0.018(5) -0.049(8) 
C27 0.067(7) 0.22(2) 0.067(8) -0.065(10) 0.041(6) -0.046(10) 
C28 0.054(6) 0.157(15) 0.066(7) -0.019(8) 0.027(6) -0.008(8) 
C29 0.061(7) 0.150(14) 0.076(8) -0.015(9) 0.035(6) -0.022(8) 
C30 0.051(6) 0.102(10) 0.056(6) -0.006(6) 0.014(5) -0.016(6) 
C31 0.041(5) 0.053(6) 0.063(6) -0.010(5) 0.003(4) 0.016(4) 
C32 0.072(7) 0.117(12) 0.069(7) -0.018(7) 0.008(6) 0.044(8) 
C33 0.100(10) 0.135(15) 0.086(10) -0.028(10) -0.006(8) 0.076(10) 
C34 0.093(9) 0.076(9) 0.108(11) -0.009(9) -0.028(8) 0.045(8) 
C35 0.075(8) 0.080(9) 0.081(8) 0.024(7) 0.008(6) 0.027(7) 
C36 0.057(6) 0.069(7) 0.057(6) 0.005(5) 0.009(5) 0.018(5) 
C37 0.027(3) 0.029(4) 0.036(4) -0.004(3) 0.009(3) -0.001(3) 
C38 0.029(3) 0.030(4) 0.021(3) -0.003(3) 0.000(2) 0.001(3) 
C39 0.038(4) 0.022(4) 0.043(4) -0.007(3) 0.011(3) 0.003(3) 
C40 0.054(5) 0.034(4) 0.030(4) -0.008(3) 0.010(3) 0.004(4) 
C41 0.068(6) 0.045(5) 0.035(4) -0.002(4) 0.017(4) -0.002(4) 
C42 0.061(5) 0.039(5) 0.034(4) -0.002(3) 0.027(4) 0.000(4) 
C43 0.039(4) 0.023(4) 0.036(4) 0.000(3) 0.013(3) 0.001(3) 
C44 0.048(5) 0.034(5) 0.056(5) 0.004(4) 0.000(4) -0.012(4) 
C45 0.063(6) 0.047(6) 0.053(5) 0.012(4) 0.004(4) -0.009(5) 
C46 0.061(6) 0.039(5) 0.062(6) 0.026(4) 0.015(5) 0.009(4) 
C47 0.046(4) 0.028(4) 0.067(6) 0.003(4) 0.020(4) -0.001(4) 
C48 0.041(4) 0.030(4) 0.045(4) -0.003(3) 0.015(3) -0.006(3) 
C49 0.036(4) 0.036(4) 0.032(4) 0.003(3) 0.010(3) -0.009(3) 
C50 0.035(4) 0.032(4) 0.048(5) 0.002(3) 0.011(3) 0.002(3) 
C51 0.039(4) 0.045(5) 0.051(5) -0.001(4) 0.010(4) 0.005(4) 
C52 0.033(4) 0.074(7) 0.057(6) 0.004(5) 0.018(4) -0.009(4) 
C53 0.047(5) 0.055(6) 0.038(4) -0.007(4) 0.004(4) -0.010(4) 
C54 0.030(4) 0.047(5) 0.043(4) -0.011(4) 0.009(3) -0.008(3) 
C55 0.027(3) 0.031(4) 0.046(4) 0.006(3) 0.008(3) 0.004(3) 
C56 0.036(4) 0.030(4) 0.032(4) 0.001(3) 0.006(3) 0.006(3) 
C57 0.039(4) 0.037(5) 0.048(5) -0.007(4) 0.008(4) 0.003(4) 
C58 0.058(5) 0.034(5) 0.057(6) 0.005(4) 0.007(4) 0.022(4) 
C59 0.029(4) 0.054(6) 0.077(7) 0.014(5) -0.003(4) 0.016(4) 
C60 0.030(4) 0.036(5) 0.066(6) 0.003(4) 0.002(4) 0.000(3) 
C61 0.025(3) 0.035(4) 0.038(4) 0.003(3) 0.002(3) -0.001(3) 
C62 0.030(4) 0.034(4) 0.045(4) 0.007(3) 0.001(3) -0.005(3) 
C63 0.047(4) 0.032(4) 0.053(5) -0.008(4) 0.005(4) -0.007(4) 
C64 0.042(4) 0.054(6) 0.045(5) -0.004(4) -0.003(4) -0.001(4) 
C65 0.044(4) 0.071(7) 0.039(5) 0.008(4) -0.001(4) -0.001(4) 
C66 0.040(4) 0.039(5) 0.049(5) 0.008(4) 0.002(3) -0.005(4) 
C67 0.025(3) 0.053(5) 0.037(4) 0.007(3) 0.005(3) -0.008(3) 
C68 0.049(5) 0.053(6) 0.055(5) 0.010(4) 0.021(4) -0.002(4) 
C69 0.045(5) 0.059(7) 0.076(7) 0.019(5) 0.024(5) -0.006(4) 
C70 0.036(5) 0.095(9) 0.057(6) 0.012(6) 0.022(4) -0.013(5) 
C71 0.045(5) 0.082(8) 0.080(7) 0.012(7) 0.032(5) 0.001(6) 
C72 0.043(4) 0.046(5) 0.062(6) -0.004(4) 0.018(4) 0.003(4) 
C73 0.028(4) 0.056(6) 0.040(4) 0.025(4) 0.012(3) 0.011(4) 
C74 0.034(4) 0.057(6) 0.034(4) 0.008(4) 0.011(3) 0.004(4) 
C81 0.023(3) 0.041(4) 0.033(4) 0.007(3) 0.005(3) -0.005(3) 
C82 0.022(3) 0.036(4) 0.019(3) 0.005(3) 0.004(2) 0.007(3) 
C83 0.121(10) 0.054(7) 0.064(7) 0.007(5) 0.049(7) -0.007(7) 
C84 0.097(9) 0.042(6) 0.070(7) 0.005(5) 0.016(6) -0.002(6) 
C85 0.153(15) 0.047(7) 0.130(13) 0.027(8) 0.069(12) 0.012(8) 
C86 0.23(2) 0.029(6) 0.132(13) 0.035(7) 0.109(14) 0.022(9) 
C87 0.123(10) 0.037(6) 0.071(7) 0.012(5) 0.048(7) 0.013(6) 
N2 0.038(3) 0.063(5) 0.036(4) -0.004(3) 0.008(3) -0.007(3) 
C88 0.069(7) 0.091(9) 0.061(7) -0.021(6) 0.012(5) -0.008(7) 
C89 0.094(10) 0.115(14) 0.096(11) -0.029(10) 0.003(8) -0.026(10) 
C90 0.118(12) 0.101(13) 0.107(12) 0.010(10) 0.032(10) -0.020(11) 
C91 0.116(11) 0.107(11) 0.053(7) -0.003(7) 0.037(7) 0.000(9) 
C92 0.094(9) 0.085(9) 0.066(7) -0.007(7) 0.034(7) 0.011(7) 
C93 0.050(5) 0.047(5) 0.043(5) -0.004(4) 0.012(4) -0.001(4) 
C94 0.063(6) 0.046(6) 0.072(6) -0.008(5) 0.035(5) -0.012(5) 
C95 0.060(6) 0.077(8) 0.082(8) -0.041(7) 0.028(5) -0.016(6) 
C96 0.052(5) 0.057(6) 0.046(5) -0.017(4) 0.022(4) -0.012(4) 
C97 0.038(4) 0.051(5) 0.032(4) -0.009(4) 0.014(3) 0.002(4) 
C98 0.037(4) 0.038(5) 0.044(4) 0.007(4) -0.006(3) -0.012(3) 
C99 0.068(6) 0.042(6) 0.064(6) 0.019(5) -0.005(5) -0.002(5) 
C100 0.060(6) 0.017(4) 0.095(8) 0.013(4) 0.019(5) 0.004(4) 
C101 0.053(5) 0.033(5) 0.081(7) -0.004(4) 0.026(5) -0.003(4) 
C102 0.037(4) 0.030(4) 0.040(4) -0.004(3) 0.006(3) 0.002(3) 
C77 0.045(4) 0.044(5) 0.030(4) 0.013(3) 0.020(3) 0.021(4) 
C78 0.042(4) 0.073(7) 0.034(4) 0.006(4) 0.000(3) -0.035(5) 
 
_geom_special_details 
; 
 All esds (except the esd in the dihedral angle between two l.s. planes) 
 are estimated using the full covariance matrix.  The cell esds are taken 
 into account individually in the estimation of esds in distances, angles 
 and torsion angles; correlations between esds in cell parameters are only 
 used when they are defined by crystal symmetry.  An approximate (isotropic) 
 treatment of cell esds is used for estimating esds involving l.s. planes. 
; 
 
loop_ 
 _geom_bond_atom_site_label_1 
 _geom_bond_atom_site_label_2 
 _geom_bond_distance 
 _geom_bond_site_symmetry_2 
 _geom_bond_publ_flag 
Rh1 C20 2.017(7) . ? 
Rh1 O5 2.175(5) . ? 
Rh1 O1 2.207(5) . ? 
Rh1 P1 2.2209(19) . ? 
Rh1 N1 2.257(7) . ? 
Rh1 Rh2 2.5803(11) . ? 
Rh2 C2 2.004(7) . ? 
Rh2 O2 2.157(5) . ? 
Rh2 O6 2.199(6) . ? 
Rh2 P2 2.220(2) . ? 
Rh2 N2 2.297(5) . ? 
Rh3 C56 2.014(7) . ? 
Rh3 O7 2.185(5) . ? 
Rh3 O3 2.186(5) . ? 
Rh3 P3 2.2112(19) . ? 
Rh3 N3 2.289(7) . ? 
Rh3 Rh4 2.5816(9) . ? 
Rh4 C38 2.013(6) . ? 
Rh4 O4 2.174(5) . ? 
Rh4 O8 2.187(4) . ? 
Rh4 P4 2.2087(18) . ? 
Rh4 N4 2.272(7) . ? 
P1 C1 1.810(8) . ? 
P1 C7 1.839(8) . ? 
P1 C13 1.855(8) . ? 
P2 C19 1.806(9) . ? 
P2 C25 1.847(9) . ? 
P2 C31 1.871(11) . ? 
P3 C37 1.808(8) . ? 
P3 C43 1.832(8) . ? 
P3 C49 1.841(8) . ? 
P4 C55 1.804(8) . ? 
P4 C67 1.833(7) . ? 
P4 C61 1.841(8) . ? 
F1 C74 1.324(10) . ? 
F2 C74 1.352(10) . ? 
F11 C81 1.338(9) . ? 
F12 C81 1.362(9) . ? 
O1 C73 1.256(11) . ? 
O2 C73 1.252(10) . ? 
O3 C77 1.244(10) . ? 
O4 C77 1.263(9) . ? 
O5 C78 1.242(11) . ? 
O6 C78 1.255(11) . ? 
O7 C82 1.233(9) . ? 
O8 C82 1.242(9) . ? 
N1 C87 1.339(12) . ? 
N1 C83 1.351(13) . ? 
N3 C97 1.351(10) . ? 
N3 C93 1.354(12) . ? 
N4 C98 1.337(10) . ? 
N4 C102 1.374(10) . ? 
C1 C2 1.397(10) . ? 
C1 C6 1.413(10) . ? 
C2 C3 1.394(12) . ? 
C3 C4 1.409(12) . ? 
C4 C5 1.401(13) . ? 
C5 C6 1.357(12) . ? 
C7 C12 1.373(12) . ? 
C7 C8 1.419(11) . ? 
C8 C9 1.381(12) . ? 
C9 C10 1.347(15) . ? 
C10 C11 1.381(16) . ? 
C11 C12 1.409(14) . ? 
C13 C14 1.391(12) . ? 
C13 C18 1.396(11) . ? 
C14 C15 1.396(14) . ? 
C15 C16 1.358(15) . ? 
C16 C17 1.371(13) . ? 
C17 C18 1.413(12) . ? 
C19 C20 1.392(13) . ? 
C19 C24 1.420(12) . ? 
C20 C21 1.428(12) . ? 
C21 C22 1.397(12) . ? 
C22 C23 1.381(15) . ? 
C23 C24 1.352(15) . ? 
C25 C26 1.361(14) . ? 
C25 C30 1.375(15) . ? 
C26 C27 1.390(15) . ? 
C27 C28 1.368(18) . ? 
C28 C29 1.343(18) . ? 
C29 C30 1.389(14) . ? 
C31 C36 1.341(14) . ? 
C31 C32 1.394(14) . ? 
C32 C33 1.39(2) . ? 
C33 C34 1.34(2) . ? 
C34 C35 1.378(19) . ? 
C35 C36 1.398(16) . ? 
C37 C42 1.398(10) . ? 
C37 C38 1.408(10) . ? 
C38 C39 1.412(10) . ? 
C39 C40 1.364(11) . ? 
C40 C41 1.401(12) . ? 
C41 C42 1.375(12) . ? 
C43 C44 1.384(11) . ? 
C43 C48 1.390(10) . ? 
C44 C45 1.408(13) . ? 
C45 C46 1.379(13) . ? 
C46 C47 1.364(13) . ? 
C47 C48 1.407(12) . ? 
C49 C50 1.387(11) . ? 
C49 C54 1.420(11) . ? 
C50 C51 1.382(11) . ? 
C51 C52 1.356(14) . ? 
C52 C53 1.401(14) . ? 
C53 C54 1.385(11) . ? 
C55 C56 1.399(11) . ? 
C55 C60 1.411(11) . ? 
C56 C57 1.420(11) . ? 
C57 C58 1.388(12) . ? 
C58 C59 1.377(14) . ? 
C59 C60 1.388(13) . ? 
C61 C62 1.391(11) . ? 
C61 C66 1.420(11) . ? 
C62 C63 1.377(12) . ? 
C63 C64 1.373(13) . ? 
C64 C65 1.405(14) . ? 
C65 C66 1.362(13) . ? 
C67 C68 1.397(13) . ? 
C67 C72 1.404(12) . ? 
C68 C69 1.384(12) . ? 
C69 C70 1.342(15) . ? 
C70 C71 1.401(17) . ? 
C71 C72 1.383(12) . ? 
C73 C74 1.559(11) . ? 
C74 C75 1.547(12) . ? 
C74 C75B 1.56(3) . ? 
C81 C82 1.564(9) . ? 
C81 C80 1.568(17) . ? 
C81 C80B 1.609(16) . ? 
C83 C84 1.360(16) . ? 
C84 C85 1.344(17) . ? 
C85 C86 1.37(2) . ? 
C86 C87 1.375(15) . ? 
N2 C88 1.3900 . ? 
N2 C92 1.3900 . ? 
C88 C89 1.3900 . ? 
C89 C90 1.3900 . ? 
C90 C91 1.3900 . ? 
C91 C92 1.3900 . ? 
C93 C94 1.374(13) . ? 
C94 C95 1.383(16) . ? 
C95 C96 1.370(16) . ? 
C96 C97 1.386(12) . ? 
C98 C99 1.427(13) . ? 
C99 C100 1.343(14) . ? 
C100 C101 1.402(15) . ? 
C101 C102 1.354(12) . ? 
C75 F4 1.288(15) . ? 
C75 F3 1.319(15) . ? 
C75 C76 1.562(13) . ? 
C76 F5 1.276(14) . ? 
C76 F6 1.281(13) . ? 
C76 C77 1.584(12) . ? 
C75B F3B 1.29(3) . ? 
C75B C76B 1.39(4) . ? 
C75B F4B 1.66(4) . ? 
C76B F5B 1.32(3) . ? 
C76B C77 1.57(3) . ? 
C76B F6B 1.63(4) . ? 
C78 C79B 1.583(16) . ? 
C78 C79 1.643(18) . ? 
C79 F8 1.364(19) . ? 
C79 F7 1.382(18) . ? 
C79 C80 1.47(2) . ? 
C80 F9 1.276(18) . ? 
C80 F10 1.37(2) . ? 
C79B F7B 1.301(18) . ? 
C79B F8B 1.317(19) . ? 
C79B C80B 1.53(2) . ? 
C80B F10B 1.30(2) . ? 
C80B F9B 1.375(18) . ? 
C1S Cl2 1.720(11) . ? 
C1S Cl1 1.792(11) . ? 
C2S Cl4 1.724(14) . ? 
C2S Cl3 1.730(15) . ? 
C3S Cl6 1.697(18) . ? 
C3S Cl5 1.747(17) . ? 
C5S O5S 1.20(2) . ? 
C6S O6S 1.297(19) . ? 
Cl7 C4S 1.535(19) . ? 
Cl8 C4S 1.549(19) . ? 
 
loop_ 
 _geom_angle_atom_site_label_1 
 _geom_angle_atom_site_label_2 
 _geom_angle_atom_site_label_3 
 _geom_angle 
 _geom_angle_site_symmetry_1 
 _geom_angle_site_symmetry_3 
 _geom_angle_publ_flag 
C20 Rh1 O5 91.1(2) . . ? 
C20 Rh1 O1 175.1(2) . . ? 
O5 Rh1 O1 83.9(2) . . ? 
C20 Rh1 P1 88.4(2) . . ? 
O5 Rh1 P1 172.51(18) . . ? 
O1 Rh1 P1 96.50(15) . . ? 
C20 Rh1 N1 94.9(3) . . ? 
O5 Rh1 N1 85.7(2) . . ? 
O1 Rh1 N1 84.2(2) . . ? 
P1 Rh1 N1 101.76(19) . . ? 
C20 Rh1 Rh2 96.6(3) . . ? 
O5 Rh1 Rh2 86.08(16) . . ? 
O1 Rh1 Rh2 83.63(15) . . ? 
P1 Rh1 Rh2 86.54(6) . . ? 
N1 Rh1 Rh2 166.00(19) . . ? 
C2 Rh2 O2 91.0(2) . . ? 
C2 Rh2 O6 176.3(3) . . ? 
O2 Rh2 O6 85.4(2) . . ? 
C2 Rh2 P2 89.2(2) . . ? 
O2 Rh2 P2 172.80(18) . . ? 
O6 Rh2 P2 94.49(18) . . ? 
C2 Rh2 N2 94.9(3) . . ? 
O2 Rh2 N2 85.2(2) . . ? 
O6 Rh2 N2 83.7(2) . . ? 
P2 Rh2 N2 102.00(16) . . ? 
C2 Rh2 Rh1 97.2(2) . . ? 
O2 Rh2 Rh1 85.89(17) . . ? 
O6 Rh2 Rh1 83.65(17) . . ? 
P2 Rh2 Rh1 86.94(7) . . ? 
N2 Rh2 Rh1 165.01(16) . . ? 
C56 Rh3 O7 177.2(3) . . ? 
C56 Rh3 O3 91.9(3) . . ? 
O7 Rh3 O3 85.33(19) . . ? 
C56 Rh3 P3 89.8(2) . . ? 
O7 Rh3 P3 93.05(14) . . ? 
O3 Rh3 P3 172.85(16) . . ? 
C56 Rh3 N3 99.9(3) . . ? 
O7 Rh3 N3 79.4(2) . . ? 
O3 Rh3 N3 85.0(2) . . ? 
P3 Rh3 N3 101.57(17) . . ? 
C56 Rh3 Rh4 96.0(2) . . ? 
O7 Rh3 Rh4 84.23(14) . . ? 
O3 Rh3 Rh4 86.05(16) . . ? 
P3 Rh3 Rh4 86.86(5) . . ? 
N3 Rh3 Rh4 161.95(18) . . ? 
C38 Rh4 O4 177.7(2) . . ? 
C38 Rh4 O8 91.6(2) . . ? 
O4 Rh4 O8 86.60(18) . . ? 
C38 Rh4 P4 88.83(19) . . ? 
O4 Rh4 P4 93.15(14) . . ? 
O8 Rh4 P4 172.81(15) . . ? 
C38 Rh4 N4 98.5(3) . . ? 
O4 Rh4 N4 79.9(2) . . ? 
O8 Rh4 N4 84.3(2) . . ? 
P4 Rh4 N4 102.71(17) . . ? 
C38 Rh4 Rh3 97.2(2) . . ? 
O4 Rh4 Rh3 84.10(15) . . ? 
O8 Rh4 Rh3 85.24(14) . . ? 
P4 Rh4 Rh3 87.59(5) . . ? 
N4 Rh4 Rh3 161.38(18) . . ? 
C1 P1 C7 103.6(3) . . ? 
C1 P1 C13 102.7(4) . . ? 
C7 P1 C13 100.9(4) . . ? 
C1 P1 Rh1 113.5(2) . . ? 
C7 P1 Rh1 119.5(2) . . ? 
C13 P1 Rh1 114.5(3) . . ? 
C19 P2 C25 103.4(4) . . ? 
C19 P2 C31 103.3(4) . . ? 
C25 P2 C31 103.0(5) . . ? 
C19 P2 Rh2 113.1(3) . . ? 
C25 P2 Rh2 112.6(3) . . ? 
C31 P2 Rh2 119.7(3) . . ? 
C37 P3 C43 102.6(3) . . ? 
C37 P3 C49 103.1(3) . . ? 
C43 P3 C49 105.2(3) . . ? 
C37 P3 Rh3 113.5(2) . . ? 
C43 P3 Rh3 118.7(2) . . ? 
C49 P3 Rh3 112.1(2) . . ? 
C55 P4 C67 103.3(4) . . ? 
C55 P4 C61 102.6(4) . . ? 
C67 P4 C61 105.2(4) . . ? 
C55 P4 Rh4 113.3(3) . . ? 
C67 P4 Rh4 113.5(2) . . ? 
C61 P4 Rh4 117.5(2) . . ? 
C73 O1 Rh1 117.9(5) . . ? 
C73 O2 Rh2 116.9(5) . . ? 
C77 O3 Rh3 117.4(5) . . ? 
C77 O4 Rh4 119.8(5) . . ? 
C78 O5 Rh1 116.6(5) . . ? 
C78 O6 Rh2 118.7(5) . . ? 
C82 O7 Rh3 118.7(4) . . ? 
C82 O8 Rh4 116.6(4) . . ? 
C87 N1 C83 112.4(9) . . ? 
C87 N1 Rh1 120.0(7) . . ? 
C83 N1 Rh1 127.1(6) . . ? 
C97 N3 C93 116.1(7) . . ? 
C97 N3 Rh3 115.4(6) . . ? 
C93 N3 Rh3 128.2(6) . . ? 
C98 N4 C102 116.1(7) . . ? 
C98 N4 Rh4 114.1(5) . . ? 
C102 N4 Rh4 129.4(5) . . ? 
C2 C1 C6 121.1(7) . . ? 
C2 C1 P1 116.4(5) . . ? 
C6 C1 P1 122.3(6) . . ? 
C3 C2 C1 116.3(7) . . ? 
C3 C2 Rh2 121.2(6) . . ? 
C1 C2 Rh2 122.6(6) . . ? 
C2 C3 C4 122.8(8) . . ? 
C5 C4 C3 118.5(8) . . ? 
C6 C5 C4 119.6(8) . . ? 
C5 C6 C1 121.0(8) . . ? 
C12 C7 C8 118.9(8) . . ? 
C12 C7 P1 123.6(7) . . ? 
C8 C7 P1 117.5(6) . . ? 
C9 C8 C7 120.1(8) . . ? 
C10 C9 C8 119.5(9) . . ? 
C9 C10 C11 123.0(10) . . ? 
C10 C11 C12 117.8(10) . . ? 
C7 C12 C11 120.7(10) . . ? 
C14 C13 C18 118.6(7) . . ? 
C14 C13 P1 121.8(7) . . ? 
C18 C13 P1 119.5(6) . . ? 
C13 C14 C15 119.3(9) . . ? 
C16 C15 C14 122.7(9) . . ? 
C15 C16 C17 118.7(8) . . ? 
C16 C17 C18 120.6(9) . . ? 
C13 C18 C17 120.1(8) . . ? 
C20 C19 C24 121.1(8) . . ? 
C20 C19 P2 116.7(6) . . ? 
C24 C19 P2 121.8(7) . . ? 
C19 C20 C21 116.6(7) . . ? 
C19 C20 Rh1 122.7(6) . . ? 
C21 C20 Rh1 120.7(7) . . ? 
C22 C21 C20 120.8(9) . . ? 
C23 C22 C21 120.8(9) . . ? 
C24 C23 C22 119.7(8) . . ? 
C23 C24 C19 120.9(9) . . ? 
C26 C25 C30 118.3(9) . . ? 
C26 C25 P2 120.6(9) . . ? 
C30 C25 P2 121.1(7) . . ? 
C25 C26 C27 121.0(12) . . ? 
C28 C27 C26 120.4(11) . . ? 
C29 C28 C27 118.3(11) . . ? 
C28 C29 C30 122.1(13) . . ? 
C25 C30 C29 119.7(11) . . ? 
C36 C31 C32 119.5(11) . . ? 
C36 C31 P2 119.0(7) . . ? 
C32 C31 P2 121.5(9) . . ? 
C33 C32 C31 120.2(13) . . ? 
C34 C33 C32 118.6(13) . . ? 
C33 C34 C35 123.0(14) . . ? 
C34 C35 C36 117.2(13) . . ? 
C31 C36 C35 121.5(11) . . ? 
C42 C37 C38 121.0(7) . . ? 
C42 C37 P3 121.3(6) . . ? 
C38 C37 P3 117.5(5) . . ? 
C37 C38 C39 116.5(6) . . ? 
C37 C38 Rh4 121.6(5) . . ? 
C39 C38 Rh4 121.9(5) . . ? 
C40 C39 C38 121.8(7) . . ? 
C39 C40 C41 121.4(7) . . ? 
C42 C41 C40 118.0(7) . . ? 
C41 C42 C37 121.3(8) . . ? 
C44 C43 C48 117.5(7) . . ? 
C44 C43 P3 118.3(6) . . ? 
C48 C43 P3 124.2(6) . . ? 
C43 C44 C45 122.2(8) . . ? 
C46 C45 C44 117.8(9) . . ? 
C47 C46 C45 122.2(8) . . ? 
C46 C47 C48 118.7(8) . . ? 
C43 C48 C47 121.6(8) . . ? 
C50 C49 C54 117.7(7) . . ? 
C50 C49 P3 121.9(6) . . ? 
C54 C49 P3 120.3(6) . . ? 
C51 C50 C49 122.2(8) . . ? 
C52 C51 C50 119.0(8) . . ? 
C51 C52 C53 121.9(8) . . ? 
C54 C53 C52 118.8(8) . . ? 
C53 C54 C49 120.3(8) . . ? 
C56 C55 C60 122.0(7) . . ? 
C56 C55 P4 116.9(5) . . ? 
C60 C55 P4 120.9(6) . . ? 
C55 C56 C57 115.4(7) . . ? 
C55 C56 Rh3 123.2(5) . . ? 
C57 C56 Rh3 121.3(6) . . ? 
C58 C57 C56 122.5(8) . . ? 
C59 C58 C57 120.4(8) . . ? 
C58 C59 C60 119.2(8) . . ? 
C59 C60 C55 120.3(8) . . ? 
C62 C61 C66 117.2(7) . . ? 
C62 C61 P4 124.3(6) . . ? 
C66 C61 P4 118.2(6) . . ? 
C63 C62 C61 122.1(8) . . ? 
C64 C63 C62 120.1(8) . . ? 
C63 C64 C65 119.0(9) . . ? 
C66 C65 C64 121.1(9) . . ? 
C65 C66 C61 120.3(8) . . ? 
C68 C67 C72 117.7(8) . . ? 
C68 C67 P4 120.5(6) . . ? 
C72 C67 P4 121.7(7) . . ? 
C69 C68 C67 121.9(9) . . ? 
C70 C69 C68 120.0(10) . . ? 
C69 C70 C71 119.9(8) . . ? 
C72 C71 C70 121.0(10) . . ? 
C71 C72 C67 119.4(9) . . ? 
O2 C73 O1 129.6(7) . . ? 
O2 C73 C74 115.6(8) . . ? 
O1 C73 C74 114.8(7) . . ? 
F1 C74 F2 107.4(6) . . ? 
F1 C74 C75 116.0(8) . . ? 
F2 C74 C75 106.0(7) . . ? 
F1 C74 C73 109.6(7) . . ? 
F2 C74 C73 110.9(7) . . ? 
C75 C74 C73 106.8(6) . . ? 
F1 C74 C75B 94.3(14) . . ? 
F2 C74 C75B 116.0(13) . . ? 
C73 C74 C75B 116.8(12) . . ? 
F11 C81 F12 106.3(5) . . ? 
F11 C81 C82 110.9(6) . . ? 
F12 C81 C82 110.6(6) . . ? 
F11 C81 C80 97.2(9) . . ? 
F12 C81 C80 115.0(8) . . ? 
C82 C81 C80 115.6(7) . . ? 
F11 C81 C80B 122.4(9) . . ? 
F12 C81 C80B 100.1(8) . . ? 
C82 C81 C80B 105.9(7) . . ? 
O7 C82 O8 130.7(6) . . ? 
O7 C82 C81 115.2(6) . . ? 
O8 C82 C81 114.2(6) . . ? 
N1 C83 C84 127.0(10) . . ? 
C85 C84 C83 117.3(12) . . ? 
C84 C85 C86 119.7(13) . . ? 
C85 C86 C87 118.3(12) . . ? 
N1 C87 C86 124.9(12) . . ? 
C88 N2 C92 120.0 . . ? 
C88 N2 Rh2 116.5(4) . . ? 
C92 N2 Rh2 123.5(4) . . ? 
C89 C88 N2 120.0 . . ? 
C90 C89 C88 120.0 . . ? 
C89 C90 C91 120.0 . . ? 
C92 C91 C90 120.0 . . ? 
C91 C92 N2 120.0 . . ? 
N3 C93 C94 124.8(9) . . ? 
C93 C94 C95 117.3(10) . . ? 
C96 C95 C94 119.8(10) . . ? 
C95 C96 C97 119.2(9) . . ? 
N3 C97 C96 122.7(9) . . ? 
N4 C98 C99 121.7(8) . . ? 
C100 C99 C98 120.4(9) . . ? 
C99 C100 C101 118.5(8) . . ? 
C102 C101 C100 118.5(9) . . ? 
C101 C102 N4 124.8(8) . . ? 
F4 C75 F3 94.9(10) . . ? 
F4 C75 C74 115.9(9) . . ? 
F3 C75 C74 106.0(9) . . ? 
F4 C75 C76 110.1(10) . . ? 
F3 C75 C76 110.4(9) . . ? 
C74 C75 C76 117.0(8) . . ? 
F5 C76 F6 98.0(10) . . ? 
F5 C76 C75 114.4(10) . . ? 
F6 C76 C75 111.7(9) . . ? 
F5 C76 C77 115.0(8) . . ? 
F6 C76 C77 109.9(8) . . ? 
C75 C76 C77 107.6(8) . . ? 
F3B C75B C76B 126(3) . . ? 
F3B C75B C74 111(2) . . ? 
C76B C75B C74 118(3) . . ? 
F3B C75B F4B 95(2) . . ? 
C76B C75B F4B 85(3) . . ? 
C74 C75B F4B 114.2(19) . . ? 
F5B C76B C75B 123(3) . . ? 
F5B C76B C77 111(2) . . ? 
C75B C76B C77 120(2) . . ? 
F5B C76B F6B 95(2) . . ? 
C75B C76B F6B 86(2) . . ? 
C77 C76B F6B 115(2) . . ? 
O3 C77 O4 129.0(7) . . ? 
O3 C77 C76B 107.1(13) . . ? 
O4 C77 C76B 121.6(13) . . ? 
O3 C77 C76 120.3(7) . . ? 
O4 C77 C76 110.5(7) . . ? 
O5 C78 O6 130.0(8) . . ? 
O5 C78 C79B 122.7(9) . . ? 
O6 C78 C79B 105.5(10) . . ? 
O5 C78 C79 107.0(9) . . ? 
O6 C78 C79 121.6(9) . . ? 

F8 C79 F7 96.8(13) . . ? 
F8 C79 C80 107.2(14) . . ? 
F7 C79 C80 116.5(12) . . ? 
F8 C79 C78 117.1(12) . . ? 
F7 C79 C78 105.2(11) . . ? 
C80 C79 C78 113.3(13) . . ? 
F9 C80 F10 95.5(14) . . ? 
F9 C80 C79 116.1(13) . . ? 
F10 C80 C79 109.3(13) . . ? 
F9 C80 C81 110.1(11) . . ? 
F10 C80 C81 111.2(12) . . ? 
C79 C80 C81 113.2(14) . . ? 
F7B C79B F8B 96.8(11) . . ? 
F7B C79B C80B 107.7(14) . . ? 
F8B C79B C80B 112.7(13) . . ? 
F7B C79B C78 109.7(11) . . ? 
F8B C79B C78 122.2(14) . . ? 
C80B C79B C78 106.7(11) . . ? 
F10B C80B F9B 95.3(13) . . ? 
F10B C80B C79B 110.0(14) . . ? 
F9B C80B C79B 109.5(13) . . ? 
F10B C80B C81 115.8(13) . . ? 
F9B C80B C81 103.4(10) . . ? 
C79B C80B C81 119.5(11) . . ? 
Cl2 C1S Cl1 110.0(6) . . ? 
Cl4 C2S Cl3 116.6(9) . . ? 
Cl6 C3S Cl5 113.9(10) . . ? 
Cl7 C4S Cl8 157(5) . . ? 
 
loop_ 
 _geom_torsion_atom_site_label_1 
 _geom_torsion_atom_site_label_2 
 _geom_torsion_atom_site_label_3 
 _geom_torsion_atom_site_label_4 
 _geom_torsion 
 _geom_torsion_site_symmetry_1 
 _geom_torsion_site_symmetry_2 
 _geom_torsion_site_symmetry_3 
 _geom_torsion_site_symmetry_4 
 _geom_torsion_publ_flag 
P1 Rh1 Rh2 P2 99.00(8) . . . . ? 
C20 Rh1 Rh2 C2 -77.8(3) . . . . ? 
P1 Rh1 Rh2 C2 10.2(2) . . . . ? 
C20 Rh1 Rh2 P2 11.0(2) . . . . ? 
O1 Rh1 Rh2 O2 16.6(2) . . . . ? 
O5 Rh1 Rh2 O6 15.1(2) . . . . ? 
P3 Rh3 Rh4 P4 100.66(7) . . . . ? 
C56 Rh3 Rh4 C38 -77.3(3) . . . . ? 
P3 Rh3 Rh4 C38 12.14(19) . . . . ? 
C56 Rh3 Rh4 P4 11.2(2) . . . . ? 
O3 Rh3 Rh4 O4 13.2(2) . . . . ? 
O7 Rh3 Rh4 O8 14.54(17) . . . . ? 
 
_diffrn_measured_fraction_theta_max    0.988 
_diffrn_reflns_theta_full              27.50 
_diffrn_measured_fraction_theta_full   0.988 
_refine_diff_density_max    1.583 
_refine_diff_density_min   -1.070 
_refine_diff_density_rms    0.119 

#===END of CIF for Compound 2 ===============================
